# Supplementary material
Source: PubMed Central journal article supplement (PMC373293)
Supplement: nar_32_1_179__2.pdf [file nar_32_1_179__2.pdf]

ROVER Output:  
Sequence Pvalue Cutoff: 0.01  
Site Pvalue Cutoff: 0.001

Matrix: M00664.mat STE12 Accessions (YHR084W)

Binomial p-value: 7.03333e-19

Matched Sequence: YFL027C 1.73879e-08 x  
Element: ATGAAAC Start: 72 Stop: 78 Pval: 3.72606e-05  
Element: ATGAAAC Start: 531 Stop: 525 Pval: 3.72606e-05  
Element: ATGAAAC Start: 657 Stop: 651 Pval: 3.72606e-05  
Element: ATGAAAC Start: 884 Stop: 878 Pval: 3.72606e-05

Matched Sequence: YFL026W 1.17893e-06 STE2  
Element: ATGAAAC Start: 450 Stop: 456 Pval: 3.72606e-05  
Element: ATGAAAC Start: 677 Stop: 683 Pval: 3.72606e-05  
Element: ATGAAAC Start: 803 Stop: 809 Pval: 3.72606e-05

Matched Sequence: YMR232W 6.86921e-05 FUS2  
Element: ATGAAAC Start: 408 Stop: 402 Pval: 3.72606e-05  
Element: CTGAAAC Start: 779 Stop: 785 Pval: 0.000186303  
Element: CTGAAAC Start: 800 Stop: 806 Pval: 0.000186303  
Element: TTGAAAC Start: 651 Stop: 645 Pval: 0.000316715  
Element: GTGAAAC Start: 934 Stop: 940 Pval: 0.000335345

Matched Sequence: YBR083W 0.00048808 TEC1  
Element: ATGAAAC Start: 906 Stop: 912 Pval: 3.72606e-05  
Element: TTGAAAC Start: 841 Stop: 847 Pval: 0.000186303  
Element: CTGAAAC Start: 499 Stop: 493 Pval: 0.000316715  
Element: CTGAAAC Start: 618 Stop: 612 Pval: 0.000316715

Matched Sequence: YCL027W 0.000582639 FUS1  
Element: ATGAAAC Start: 814 Stop: 820 Pval: 3.72606e-05  
Element: ATGAAAC Start: 825 Stop: 831 Pval: 3.72606e-05  
Element: TTGAAAC Start: 841 Stop: 847 Pval: 0.000186303

Matched Sequence: YML047C 0.000582639 x  
Element: ATGAAAC Start: 595 Stop: 589 Pval: 3.72606e-05  
Element: CTGAAAC Start: 735 Stop: 741 Pval: 0.000186303  
Element: CTGAAAC Start: 844 Stop: 850 Pval: 0.000186303

Matched Sequence: YCL055W 0.000630162 KAR4  
Element: ATGAAAC Start: 814 Stop: 808 Pval: 3.72606e-05  
Element: ATGAAAC Start: 886 Stop: 880 Pval: 3.72606e-05  
Element: TTGAAAC Start: 908 Stop: 902 Pval: 0.000316715  
Element: GTGAAAC Start: 863 Stop: 857 Pval: 0.000335345

Matched Sequence: YHR084W 0.000630162 STE12  
Element: ATGAAAC Start: 565 Stop: 571 Pval: 3.72606e-05  
Element: TTGAAAC Start: 526 Stop: 532 Pval: 0.000186303  
Element: TTGAAAC Start: 563 Stop: 557 Pval: 0.000316715  
Element: GTGAAAC Start: 607 Stop: 613 Pval: 0.000335345

Matched Sequence: YPL156C 0.00397049 x  
Element: TTGAAAC Start: 493 Stop: 499 Pval: 0.000186303  
Element: CTGAAAC Start: 869 Stop: 875 Pval: 0.000186303  
Element: CTGAAAC Start: 739 Stop: 733 Pval: 0.000316715

Matched Sequence: YPL141C 0.00397049 x  
 Element: ATGAAAC Start: 234 Stop: 240 Pval: 3.72606e-05  
 Element: CTGAAAC Start: 650 Stop: 656 Pval: 0.000186303  
 Element: TTGAAAC Start: 677 Stop: 671 Pval: 0.000316715

Matched Sequence: YNR044W 0.00397049 AGA1  
 Element: ATGAAAC Start: 655 Stop: 649 Pval: 3.72606e-05  
 Element: CTGAAAC Start: 798 Stop: 804 Pval: 0.000186303  
 Element: TTGAAAC Start: 770 Stop: 764 Pval: 0.000316715

Matched Sequence: YNL279W 0.00397049 x  
 Element: TTGAAAC Start: 827 Stop: 821 Pval: 0.000316715  
 Element: TTGAAAC Start: 838 Stop: 832 Pval: 0.000316715  
 Element: CTGAAAC Start: 849 Stop: 843 Pval: 0.000316715

Matched Sequence: YLR042C 0.00397049 x  
 Element: ATGAAAC Start: 967 Stop: 961 Pval: 3.72606e-05  
 Element: TTGAAAC Start: 307 Stop: 313 Pval: 0.000186303  
 Element: CTGAAAC Start: 775 Stop: 769 Pval: 0.000316715

Matched Sequence: YGL032C 0.00397049 AGA2  
 Element: ATGAAAC Start: 809 Stop: 803 Pval: 3.72606e-05  
 Element: CTGAAAC Start: 696 Stop: 702 Pval: 0.000186303  
 Element: TTGAAAC Start: 613 Stop: 607 Pval: 0.000316715

Matched Sequence: YJL170C 0.00484826 ASG7  
 Element: TTGAAAC Start: 764 Stop: 770 Pval: 0.000186303  
 Element: TTGAAAC Start: 720 Stop: 714 Pval: 0.000316715  
 Element: GTGAAAC Start: 510 Stop: 504 Pval: 0.000335345

Matched Sequence: YJL157C 0.00484826 FAR1  
 Element: CTGAAAC Start: 668 Stop: 662 Pval: 0.000316715  
 Element: TTGAAAC Start: 791 Stop: 785 Pval: 0.000316715  
 Element: GTGAAAC Start: 113 Stop: 119 Pval: 0.000335345

Matched Sequence: YLR452C 0.00642354 SST2  
 Element: ATGAAAC Start: 743 Stop: 737 Pval: 3.72606e-05  
 Element: TTGAAAC Start: 755 Stop: 761 Pval: 0.000186303

Matched Sequence: YPR122W 0.00642354 AXL1  
 Element: ATGAAAC Start: 850 Stop: 856 Pval: 3.72606e-05  
 Element: TTGAAAC Start: 785 Stop: 791 Pval: 0.000186303
