# Supplementary material
Source: PubMed Central journal article supplement (PMC373293)
Supplement: nar_32_1_179__3.pdf [file nar_32_1_179__3.pdf]

ROVER Output:

Sequence Pvalue Cutoff: 0.01

Site Pvalue Cutoff: 0.001

| Matrix | Pvalue      |                   |
|--------|-------------|-------------------|
| M00664 | 7.03333e-19 | STE12             |
| M00125 | 5.12057e-05 | MCM1              |
| M00759 | 0.00184259  | MCM1+SFF          |
| M00703 | 0.00745629  | TAF               |
| M00275 | 0.0104435   | MAT1-Mc           |
| M00204 | 0.0104438   | GCN4              |
| M00683 | 0.0148831   | XBP1              |
| M00713 | 0.0188875   | TBP               |
| M00728 | 0.0245664   | ROX1              |
| M00213 | 0.0423161   | RAP1              |
| M00199 | 0.0776365   | AP1               |
| M00274 | 0.0942194   | STE11             |
| M00337 | 0.14703     | GCR1              |
| M00029 | 0.164711    | HSF               |
| M00303 | 0.219779    | CBF1              |
| M00288 | 0.263505    | HAP2/3/5          |
| M00276 | 0.305734    | Mat1-Mc           |
| M00207 | 0.307418    | LAC9              |
| M00169 | 0.358057    | HSF               |
| M00754 | 0.358057    | ZAP1              |
| M00064 | 0.404407    | PHO4              |
| M00730 | 0.407237    | HAC1              |
| M00015 | 0.463208    | ABF1              |
| M00307 | 0.463555    | REB1              |
| M00038 | 0.519026    | GCN4              |
| M00197 | 0.573034    | ABF1              |
| M00168 | 0.626739    | HSF               |
| M00167 | 0.627927    | HSF               |
| M00049 | 0.633037    | GAL4              |
| M00048 | 0.64909     | ADR1              |
| M00046 | 0.727159    | GCR1              |
| M00031 | 0.73116     | MATalpha2         |
| M00030 | 0.781476    | MATalpha1         |
| M00014 | 0.81303     | repressor of CAR1 |
| M00753 | 0.820322    | RCS1              |
| M00305 | 0.885379    | HAP1              |
| M00198 | 0.909494    | GAL4              |
| M00170 | 0.929391    | HSF               |
| M00061 | 0.964594    | MIG1              |
| M00308 | 0.976472    | STRE              |
| M00732 | 0.991328    | CAT8              |
| M00752 | 0.999771    | PDR3              |
| M00306 | 0.99999     | LEU3              |
