# Supplementary material
Source: PubMed Central journal article supplement (PMC373293)
Supplement: nar_32_1_179__5.pdf [file nar_32_1_179__5.pdf]

ROVER Output:

Matrix: GCN4 Accessions(YEL009C)

Binomial p-value: 1.00356e-19

|                           |             |           |                   |
|---------------------------|-------------|-----------|-------------------|
| Matched Sequence: YOR202W | 2.34082e-07 | HIS3      |                   |
| Element: CAGTGACTCC       | Start: 723  | Stop: 714 | Pval: 0           |
| Element: GGATGACTCT       | Start: 876  | Stop: 885 | Pval: 5.669e-06   |
| Matched Sequence: YKL218C | 7.69559e-06 | x         |                   |
| Element: TAGTGACTCT       | Start: 438  | Stop: 447 | Pval: 5.669e-05   |
| Element: CATTGATTCA       | Start: 154  | Stop: 163 | Pval: 9.0704e-05  |
| Element: AAATGACTAA       | Start: 800  | Stop: 809 | Pval: 0.00011338  |
| Element: AAATGACGCT       | Start: 222  | Stop: 213 | Pval: 0.000198415 |
| Element: TAATGAATCA       | Start: 166  | Stop: 157 | Pval: 0.000238098 |
| Element: GAATGACTGT       | Start: 720  | Stop: 711 | Pval: 0.000345809 |
| Matched Sequence: YCL030C | 1.96933e-05 | HIS4      |                   |
| Element: CAGTGACTCA       | Start: 799  | Stop: 808 | Pval: 0           |
| Element: TAGTGACTCC       | Start: 755  | Stop: 764 | Pval: 5.669e-05   |
| Element: AACTGACTCT       | Start: 743  | Stop: 752 | Pval: 9.0704e-05  |
| Element: GAATGACTGA       | Start: 828  | Stop: 819 | Pval: 0.000158732 |
| Matched Sequence: YGL184C | 2.02136e-05 | x         |                   |
| Element: GAATGAGTCA       | Start: 621  | Stop: 612 | Pval: 0.000124718 |
| Element: GGCTGACTCA       | Start: 609  | Stop: 618 | Pval: 0.00017007  |
| Element: CAATGACTGT       | Start: 916  | Stop: 907 | Pval: 0.000232429 |
| Element: CGATGAGTCT       | Start: 737  | Stop: 728 | Pval: 0.000368485 |
| Element: GGAAGACTCA       | Start: 725  | Stop: 734 | Pval: 0.000391161 |
| Element: GTATGATTCA       | Start: 62   | Stop: 71  | Pval: 0.000402499 |
| Matched Sequence: YIR034C | 2.09701e-05 | LYS1      |                   |
| Element: CCATGACTCT       | Start: 428  | Stop: 437 | Pval: 0.000130387 |
| Element: CGATGAGTCA       | Start: 748  | Stop: 757 | Pval: 0.000175739 |
| Element: AAAAGACTCT       | Start: 759  | Stop: 768 | Pval: 0.000198415 |
| Element: TTATGACTCT       | Start: 875  | Stop: 866 | Pval: 0.000362816 |
| Element: TAATGACCCT       | Start: 678  | Stop: 687 | Pval: 0.000691618 |
| Element: GGATGACTTT       | Start: 883  | Stop: 874 | Pval: 0.000804998 |
| Element: GGGTGCCTCA       | Start: 66   | Stop: 57  | Pval: 0.000827674 |
| Element: TTTTACTCA        | Start: 760  | Stop: 751 | Pval: 0.000839012 |
| Element: AAGTGGTTCA       | Start: 425  | Stop: 416 | Pval: 0.000918378 |
| Matched Sequence: YDR354W | 4.74995e-05 | TRP4      |                   |
| Element: AAATGATTCA       | Start: 848  | Stop: 857 | Pval: 0           |
| Element: GATTGACTCT       | Start: 833  | Stop: 842 | Pval: 7.9366e-05  |
| Element: TGGTGACTCT       | Start: 38   | Stop: 47  | Pval: 9.6373e-05  |
| Matched Sequence: YIL116W | 7.29908e-05 | HIS5      |                   |
| Element: AATTGACTCC       | Start: 700  | Stop: 691 | Pval: 3.9683e-05  |
| Element: TGTTGACTCA       | Start: 796  | Stop: 805 | Pval: 0.000130387 |
| Element: AAGTGAGTCA       | Start: 808  | Stop: 799 | Pval: 0.000130387 |
| Element: AGATGACTAA       | Start: 725  | Stop: 734 | Pval: 0.000277781 |
| Element: TAATGACTAA       | Start: 664  | Stop: 673 | Pval: 0.00034014  |
| Matched Sequence: YCL009C | 8.9031e-05  | ILV6      |                   |
| Element: AATTGATTCT       | Start: 468  | Stop: 459 | Pval: 0.000130387 |
| Element: AAGTGAGTCA       | Start: 860  | Stop: 851 | Pval: 0.000130387 |
| Element: AAGAGACTCA       | Start: 148  | Stop: 139 | Pval: 0.000204084 |

|                           |             |           |                   |
|---------------------------|-------------|-----------|-------------------|
| Element: TCGTGA           | Start: 848  | Stop: 857 | Pval: 0.000368485 |
| Element: TAATGAGTCT       | Start: 136  | Stop: 145 | Pval: 0.000408168 |
| Element: AGGTGATTCG       | Start: 839  | Stop: 830 | Pval: 0.00079366  |
| Element: GATGGA           | Start: 662  | Stop: 671 | Pval: 0.000827674 |
| Element: AAATGGTTCT       | Start: 509  | Stop: 500 | Pval: 0.000884364 |
| Matched Sequence: YMR108W | 0.000150871 | ILV2      |                   |
| Element: CGATGATTC        | Start: 643  | Stop: 652 | Pval: 5.669e-05   |
| Element: AAATGAATCA       | Start: 655  | Stop: 646 | Pval: 7.9366e-05  |
| Element: AATTGATTCT       | Start: 995  | Stop: 986 | Pval: 0.000130387 |
| Matched Sequence: YJR109C | 0.00015805  | CPA2      |                   |
| Element: AAATGA           | Start: 652  | Stop: 661 | Pval: 0           |
| Element: GAATGACTCT       | Start: 705  | Stop: 714 | Pval: 0           |
| Element: TGGTGA           | Start: 217  | Stop: 226 | Pval: 7.3697e-05  |
| Element: GGATGAGTCA       | Start: 664  | Stop: 655 | Pval: 0.000328802 |
| Element: AAGTGACCCT       | Start: 422  | Stop: 431 | Pval: 0.000391161 |
| Element: AGGTGACACA       | Start: 785  | Stop: 776 | Pval: 0.000561231 |
| Matched Sequence: YMR062C | 0.000239888 | ECM40     |                   |
| Element: GGATGA           | Start: 846  | Stop: 855 | Pval: 0           |
| Element: CAATGAATCT       | Start: 318  | Stop: 327 | Pval: 0.000141725 |
| Element: CAGTGAGTCA       | Start: 858  | Stop: 849 | Pval: 0.000147394 |
| Matched Sequence: YER069W | 0.000410375 | ARG5,6    |                   |
| Element: GAATGA           | Start: 775  | Stop: 784 | Pval: 0           |
| Element: TGATGACTCT       | Start: 821  | Stop: 830 | Pval: 6.8028e-05  |
| Element: GAATGACTAA       | Start: 644  | Stop: 653 | Pval: 0.00017007  |
| Matched Sequence: YPR058W | 0.000448813 | YMC1      |                   |
| Element: GATTGA           | Start: 802  | Stop: 811 | Pval: 5.669e-06   |
| Element: GAATGAGTCA       | Start: 814  | Stop: 805 | Pval: 0.000124718 |
| Element: AACTGATTCA       | Start: 577  | Stop: 586 | Pval: 0.000215422 |
| Element: CCGTGA           | Start: 531  | Stop: 522 | Pval: 0.000311795 |
| Matched Sequence: YDR158W | 0.000576032 | HOM2      |                   |
| Element: GATTGA           | Start: 814  | Stop: 823 | Pval: 5.669e-06   |
| Element: AAATGAGTCA       | Start: 826  | Stop: 817 | Pval: 7.9366e-05  |
| Matched Sequence: YPL092W | 0.000629738 | SSU1      |                   |
| Element: AGAAGACTCA       | Start: 694  | Stop: 703 | Pval: 0.000277781 |
| Element: CGATGAGTCT       | Start: 706  | Stop: 697 | Pval: 0.000368485 |
| Element: AGATGACACT       | Start: 465  | Stop: 474 | Pval: 0.000532886 |
| Element: AATTGACTGA       | Start: 596  | Stop: 605 | Pval: 0.000561231 |
| Element: CGATGTCTCC       | Start: 582  | Stop: 591 | Pval: 0.00068028  |
| Element: AGGTGAATCT       | Start: 42   | Stop: 51  | Pval: 0.000708625 |
| Matched Sequence: YKL211C | 0.000727328 | TRP3      |                   |
| Element: CGTTGA           | Start: 875  | Stop: 884 | Pval: 5.669e-05   |
| Element: GAATGAGTCA       | Start: 887  | Stop: 878 | Pval: 0.000124718 |
| Element: AAATGCCTCT       | Start: 834  | Stop: 843 | Pval: 0.000198415 |
| Matched Sequence: YBR147W | 0.000881554 | x         |                   |
| Element: CAATGA           | Start: 776  | Stop: 785 | Pval: 0           |
| Element: GATTGATTCA       | Start: 366  | Stop: 357 | Pval: 0.000124718 |
| Element: GATTGATTCT       | Start: 273  | Stop: 264 | Pval: 0.000266443 |
| Element: TTATGA           | Start: 870  | Stop: 861 | Pval: 0.000362816 |

|                           |            |           |                   |
|---------------------------|------------|-----------|-------------------|
| Matched Sequence: YOL140W | 0.00106637 | ARG8      |                   |
| Element: ATGTGACTCA       | Start: 818 | Stop: 827 | Pval: 0.000130387 |
| Element: AAGTGAGTCA       | Start: 830 | Stop: 821 | Pval: 0.000130387 |
| Element: CAGTGACTAA       | Start: 737 | Stop: 746 | Pval: 0.000243767 |
| Element: AGATCACTCA       | Start: 639 | Stop: 648 | Pval: 0.000277781 |
| Element: AAGTGACTGC       | Start: 944 | Stop: 953 | Pval: 0.000447851 |
| Element: GAATAATTCA       | Start: 975 | Stop: 984 | Pval: 0.000776653 |
| Matched Sequence: YGL224C | 0.00120587 | x         |                   |
| Element: AAATTACTCA       | Start: 721 | Stop: 730 | Pval: 0.00011338  |
| Element: CAATGAATCC       | Start: 110 | Stop: 119 | Pval: 0.00017007  |
| Element: CGATGACTAA       | Start: 717 | Stop: 708 | Pval: 0.000323133 |
| Element: CAGTGTCTCT       | Start: 566 | Stop: 557 | Pval: 0.000425175 |
| Element: TAATGATTCG       | Start: 991 | Stop: 982 | Pval: 0.000561231 |
| Element: TGATTACTCA       | Start: 586 | Stop: 595 | Pval: 0.00079366  |
| Matched Sequence: YGL117W | 0.00141771 | x         |                   |
| Element: AAATGACTCA       | Start: 755 | Stop: 746 | Pval: 0           |
| Element: AAATGACACA       | Start: 606 | Stop: 615 | Pval: 0.00011338  |
| Element: TAATGAGTCA       | Start: 743 | Stop: 752 | Pval: 0.000238098 |
| Matched Sequence: YER055C | 0.00143794 | HIS1      |                   |
| Element: AGGTGACTCA       | Start: 826 | Stop: 817 | Pval: 0           |
| Element: AAGTGAGTCA       | Start: 814 | Stop: 823 | Pval: 0.000136056 |
| Element: CAATGACTTT       | Start: 709 | Stop: 700 | Pval: 0.000232429 |
| Element: GCGTGACTCT       | Start: 716 | Stop: 725 | Pval: 0.000368485 |
| Element: CAAAGATTCA       | Start: 955 | Stop: 946 | Pval: 0.000600914 |
| Matched Sequence: YDL066W | 0.0016483  | IDP1      |                   |
| Element: GAATGATTCA       | Start: 827 | Stop: 818 | Pval: 5.669e-06   |
| Element: TGATGACTCT       | Start: 517 | Stop: 526 | Pval: 6.8028e-05  |
| Element: GAGGGACTCA       | Start: 924 | Stop: 933 | Pval: 0.000357147 |
| Element: AAGAGACTCT       | Start: 653 | Stop: 644 | Pval: 0.000391161 |
| Element: GGAGGACTCT       | Start: 738 | Stop: 747 | Pval: 0.000804998 |
| Element: TTTTGACTCA       | Start: 890 | Stop: 899 | Pval: 0.000839012 |
| Matched Sequence: YMR095C | 0.00165289 | SNO1      |                   |
| Element: TAATGACTCA       | Start: 809 | Stop: 800 | Pval: 0           |
| Element: CAATGCCTCA       | Start: 268 | Stop: 277 | Pval: 0.000119049 |
| Element: TACTGACTCA       | Start: 860 | Stop: 851 | Pval: 0.000130387 |
| Element: TCATGACTCT       | Start: 734 | Stop: 725 | Pval: 0.000362816 |
| Element: CGATGTCTCT       | Start: 91  | Stop: 82  | Pval: 0.000617921 |
| Matched Sequence: YPR167C | 0.00271546 | MET16     |                   |
| Element: ACATGACTCA       | Start: 850 | Stop: 859 | Pval: 7.9366e-05  |
| Element: GAAGGACTCA       | Start: 471 | Stop: 480 | Pval: 0.00017007  |
| Element: CAATGTCTCC       | Start: 105 | Stop: 96  | Pval: 0.000306126 |
| Element: AAGTGAATCT       | Start: 183 | Stop: 192 | Pval: 0.000328802 |
| Element: TATTGATTCT       | Start: 745 | Stop: 754 | Pval: 0.000436513 |
| Element: AAGAGATTCA       | Start: 195 | Stop: 186 | Pval: 0.000918378 |
| Matched Sequence: YBR145W | 0.00271546 | ADH5      |                   |
| Element: AAATGACTGA       | Start: 622 | Stop: 631 | Pval: 0.00011338  |
| Element: AAATGACGCT       | Start: 236 | Stop: 245 | Pval: 0.000198415 |
| Element: CAATGTCTCT       | Start: 935 | Stop: 944 | Pval: 0.000232429 |
| Element: GGATGAGTCA       | Start: 771 | Stop: 780 | Pval: 0.000328802 |

|                           |            |           |                   |
|---------------------------|------------|-----------|-------------------|
| Element: TTTTGACTCA       | Start: 783 | Stop: 774 | Pval: 0.000839012 |
| Element: AAGTTATTCA       | Start: 222 | Stop: 213 | Pval: 0.000918378 |
| Matched Sequence: YBR249C | 0.00300072 | ARO4      |                   |
| Element: AAATGACTCA       | Start: 686 | Stop: 695 | Pval: 0           |
| Element: AAGTGATTCT       | Start: 635 | Stop: 626 | Pval: 7.9366e-05  |
| Element: ACGTGATTCA       | Start: 454 | Stop: 445 | Pval: 0.000634928 |
| Element: TAATTACTCT       | Start: 915 | Stop: 906 | Pval: 0.000691618 |
| Element: GAGAGACTCT       | Start: 937 | Stop: 928 | Pval: 0.000697287 |
| Element: CGTTGAGTCA       | Start: 698 | Stop: 689 | Pval: 0.000935385 |
| Matched Sequence: YGL180W | 0.00399511 | APG1      |                   |
| Element: CAATGACTAA       | Start: 220 | Stop: 229 | Pval: 0.000119049 |
| Element: AAATGACACT       | Start: 93  | Stop: 102 | Pval: 0.000198415 |
| Element: AAATGACGCT       | Start: 620 | Stop: 611 | Pval: 0.000198415 |
| Element: TAATGAATCT       | Start: 427 | Stop: 436 | Pval: 0.000408168 |
| Element: GAGTGACACT       | Start: 75  | Stop: 84  | Pval: 0.000697287 |
| Element: AGGTGACTTT       | Start: 269 | Stop: 260 | Pval: 0.000986406 |
| Matched Sequence: YHR018C | 0.00447894 | ARG4      |                   |
| Element: GAATGACTCA       | Start: 819 | Stop: 828 | Pval: 0           |
| Element: AAGTGAGTCA       | Start: 831 | Stop: 822 | Pval: 0.000130387 |
| Element: CAGTGAATCT       | Start: 459 | Stop: 450 | Pval: 0.000328802 |
| Matched Sequence: YDR127W | 0.00458168 | ARO1      |                   |
| Element: ATATGACTCA       | Start: 775 | Stop: 784 | Pval: 7.9366e-05  |
| Element: GGATGAGTCA       | Start: 787 | Stop: 778 | Pval: 0.000328802 |
| Element: GAATGACTAC       | Start: 469 | Stop: 478 | Pval: 0.000368485 |
| Element: AGATGACGCT       | Start: 590 | Stop: 599 | Pval: 0.000532886 |
| Matched Sequence: YGL125W | 0.00475406 | MET11     |                   |
| Element: GTATGACTCA       | Start: 615 | Stop: 624 | Pval: 9.6373e-05  |
| Element: GAATGACTAA       | Start: 706 | Stop: 697 | Pval: 0.000158732 |
| Element: CTTTGACTCA       | Start: 746 | Stop: 755 | Pval: 0.000334471 |
| Matched Sequence: YMR096W | 0.00630038 | SNZ1      |                   |
| Element: TAATGACTCA       | Start: 744 | Stop: 753 | Pval: 0           |
| Element: TACTGACTCA       | Start: 693 | Stop: 702 | Pval: 0.000130387 |
| Element: TCATGACTCT       | Start: 819 | Stop: 828 | Pval: 0.000362816 |
| Matched Sequence: YGR239C | 0.00749282 | x         |                   |
| Element: AGATGACTCT       | Start: 79  | Stop: 88  | Pval: 0           |
| Element: GGATGACTAA       | Start: 842 | Stop: 851 | Pval: 0.000402499 |
| Element: CAATCATTCA       | Start: 290 | Stop: 281 | Pval: 0.000600914 |
| Element: CAATGGTTCA       | Start: 625 | Stop: 634 | Pval: 0.000600914 |
| Matched Sequence: YFR030W | 0.00807932 | MET10     |                   |
| Element: AAAAGACTCA       | Start: 818 | Stop: 827 | Pval: 0.00011338  |
| Element: GAATGAGTCT       | Start: 830 | Stop: 821 | Pval: 0.000243767 |
| Element: AGATGACTAT       | Start: 858 | Stop: 849 | Pval: 0.000532886 |
| Element: AGCTGATTCA       | Start: 527 | Stop: 518 | Pval: 0.000612252 |
| Matched Sequence: YKL001C | 0.00916621 | MET14     |                   |
| Element: GAATGATTCT       | Start: 585 | Stop: 576 | Pval: 6.2359e-05  |
| Element: GAACGACTCA       | Start: 830 | Stop: 839 | Pval: 0.00017007  |
| Element: GATTGATTCT       | Start: 89  | Stop: 98  | Pval: 0.000266443 |
| Element: AGATAACTCT       | Start: 558 | Stop: 567 | Pval: 0.000532886 |

|                           |            |           |                   |
|---------------------------|------------|-----------|-------------------|
| Element: AAATGATTGT       | Start: 483 | Stop: 474 | Pval: 0.000884364 |
| Matched Sequence: YNL104C | 0.00916621 | LEU4      |                   |
| Element: AAGTGACTCA       | Start: 897 | Stop: 906 | Pval: 0           |
| Element: CGATGACACA       | Start: 286 | Stop: 295 | Pval: 0.000323133 |
| Element: CGATGACTAA       | Start: 588 | Stop: 579 | Pval: 0.000323133 |
| Element: AAATGATTAT       | Start: 852 | Stop: 843 | Pval: 0.000884364 |
| Element: AAAGGATTCT       | Start: 938 | Stop: 947 | Pval: 0.000884364 |
| Matched Sequence: YER175C | 0.00916621 | x         |                   |
| Element: AAATGAATCA       | Start: 800 | Stop: 809 | Pval: 7.9366e-05  |
| Element: AATTGATTCT       | Start: 135 | Stop: 126 | Pval: 0.000130387 |
| Element: TCATGACTCA       | Start: 828 | Stop: 837 | Pval: 0.000175739 |
| Element: GTGTGATTCA       | Start: 812 | Stop: 803 | Pval: 0.000839012 |
| Element: AAATTATTCT       | Start: 541 | Stop: 532 | Pval: 0.000884364 |
| Matched Sequence: YER073W | 0.00968323 | x         |                   |
| Element: AAGTGTCTCA       | Start: 930 | Stop: 939 | Pval: 0.000215422 |
| Element: CAATGACGCT       | Start: 143 | Stop: 152 | Pval: 0.000238098 |
| Element: AGATGCCTCA       | Start: 418 | Stop: 409 | Pval: 0.000277781 |
| Element: TGATGAGTCA       | Start: 783 | Stop: 774 | Pval: 0.000640597 |

Matrix: GCN4      Accessions (YEL009C)

Binomial p-value: 2.68488e-40

|                                       |             |            |           |
|---------------------------------------|-------------|------------|-----------|
| Matched Sequence: YMR095C             | 3.64143e-08 | SNO1       |           |
| Element: TTCATGACTCTGACACACTCTGCCGCA  |             | Start: 735 | Stop: 709 |
| Pval: 8.07512e-05                     |             |            |           |
| Element: CATGACATAATGACTCAGCCGACAAGG  |             | Start: 816 | Stop: 790 |
| Pval: 0.000103823                     |             |            |           |
| Element: CCTTGTCGGCTGAGTCATTATGTCATG  |             | Start: 790 | Stop: 816 |
| Pval: 0.000126895                     |             |            |           |
| Element: ACCCTTGGTACGAATCATAGCGGCGCC  |             | Start: 106 | Stop: 132 |
| Pval: 0.000155734                     |             |            |           |
| Element: TGCCGTTTACTGACTCAGTTGGAATTT  |             | Start: 867 | Stop: 841 |
| Pval: 0.000173038                     |             |            |           |
| Element: CCTGCTGATTGGACTCACCACATTGAA  |             | Start: 231 | Stop: 205 |
| Pval: 0.000259557                     |             |            |           |
| Element: CAACTTCCAATGCCTCAATAATTTGAG  |             | Start: 261 | Stop: 287 |
| Pval: 0.000259557                     |             |            |           |
| Element: CATTCTTCATGACTCTGACACACTCT   |             | Start: 741 | Stop: 715 |
| Pval: 0.000288397                     |             |            |           |
| Element: GGCGCCGCTATGATTTCGTACCAAGGGT |             | Start: 132 | Stop: 106 |
| Pval: 0.000415292                     |             |            |           |
| Element: AAACCTTTCCTGACTTACGCATATCTG  |             | Start: 381 | Stop: 407 |
| Pval: 0.000513347                     |             |            |           |
| Element: CTAGTTGGAATAGCTCATCATGACATA  |             | Start: 834 | Stop: 808 |
| Pval: 0.000547955                     |             |            |           |
| Element: AAATTCCAACCTGAGTCAGTAAACGGCA |             | Start: 841 | Stop: 867 |
| Pval: 0.000882495                     |             |            |           |

|                                      |             |            |           |
|--------------------------------------|-------------|------------|-----------|
| Matched Sequence: YPL250C            | 5.70983e-06 | x          |           |
| Element: CGCGCGAAGATGACACATTGCACACCA |             | Start: 696 | Stop: 722 |
| Pval: 0                              |             |            |           |
| Element: ACCATTGTTATTACTCATTTCACTGTT |             | Start: 733 | Stop: 759 |
| Pval: 0.000109591                    |             |            |           |

Element: GCTCGCCCACTCACTCATCTCCATTAG Start: 287 Stop: 313  
 Pval: 0.000173038  
 Element: ATGGAGAATATGGCTCACAACCCCAAG Start: 506 Stop: 480  
 Pval: 0.000386452  
 Element: TATAAGAACAGGACTCATCTTGATTTTC Start: 850 Stop: 876  
 Pval: 0.000501811  
 Element: TCTCCATTAGAGACTCAACCACATTTG Start: 304 Stop: 330  
 Pval: 0.00061717  
 Element: CTTGGGGTTGTGAGCCATATTCTCCAT Start: 480 Stop: 506  
 Pval: 0.000709457  
 Element: CCATCTGCGTTGTTTCATAACCAGCCC Start: 503 Stop: 529  
 Pval: 0.000738297  
 Element: CCTGGCTCGCCCACTCACTCATCTCCA Start: 283 Stop: 309  
 Pval: 0.000801744

Matched Sequence: YNL104C 5.9404e-06 LEU4

Element: TACGTGTAAGTGACTCAGTTCTTTCAA Start: 890 Stop: 916  
 Pval: 2.30718e-05  
 Element: TGTGGCCCGATGACACACAATAGCATG Start: 279 Stop: 305  
 Pval: 8.07512e-05  
 Element: CAGCCAAGTATGACACACATTCAACTC Start: 658 Stop: 632  
 Pval: 8.07512e-05  
 Element: GGTAGAGCGATGACTAACCTACTACTG Start: 595 Stop: 569  
 Pval: 0.000109591  
 Element: AACCTACTACTGTCTCAGAGCCGGTCC Start: 580 Stop: 554  
 Pval: 0.000213414  
 Element: ACACAGCTGGTGTCTCGTCGCACATGC Start: 327 Stop: 301  
 Pval: 0.000386452  
 Element: GGACTGCTCCTGCTTCATCGTTCACAG Start: 3 Stop: 29  
 Pval: 0.000438364  
 Element: CATGCTATTGTGTGTCATCGGGCCACA Start: 305 Stop: 279  
 Pval: 0.000709457  
 Element: CTTCAGGAGTTGACTAATATATGAAAT Start: 116 Stop: 142  
 Pval: 0.000720993  
 Element: CGCATGACAGTGACTGGCCGTTACTGT Start: 695 Stop: 669  
 Pval: 0.000992086

Matched Sequence: YGL184C 8.5388e-06 x

Element: GTTATCCGGCTGACTCATTCTGACTCT Start: 602 Stop: 628  
 Pval: 5.76794e-06  
 Element: CTACCTTGAAGACTCATCGCATCTCA Start: 718 Stop: 744  
 Pval: 1.73038e-05  
 Element: AGAGTCAGAATGAGTCAGCCGGATAAC Start: 628 Stop: 602  
 Pval: 8.07512e-05  
 Element: TCAACTCGCTTGAATCATAACAATTTTT Start: 81 Stop: 55  
 Pval: 0.000109591  
 Element: TGAGATGCGATGAGTCTTCCAAGGTAG Start: 744 Stop: 718  
 Pval: 0.000340309  
 Element: TGACTCATTCTGACTCTTTTTTTGGAAA Start: 612 Stop: 638  
 Pval: 0.000357613

Matched Sequence: YOL058W 1.69943e-05 ARG1

Element: TGCCTTTAAATGACTCTTCCATACGGC Start: 743 Stop: 717  
 Pval: 5.76794e-05  
 Element: CCGTCAGTAGTGACTAACATAGCGCTC Start: 628 Stop: 602  
 Pval: 7.49833e-05  
 Element: GATTTTTTAGTGACTCATGTGCGATTT Start: 647 Stop: 673

Pval: 0.000149967  
 Element: CCAATGAAGATGAGTAATCTCTCTCTC Start: 771 Stop: 745  
 Pval: 0.000259557  
 Element: CTTCCAAGGCTGACTTACCGGTCTTGG Start: 45 Stop: 19  
 Pval: 0.000582562  
 Element: GCCGTATGGAAGAGTCATTTAAAGGCA Start: 717 Stop: 743  
 Pval: 0.000709457  
 Element: AAATGCGACATGAGTCACTAAAAAATC Start: 673 Stop: 647  
 Pval: 0.000726761  
 Element: CCAAGACCGGTAAGTCAGCCTTGGAAAG Start: 19 Stop: 45  
 Pval: 0.000778672  
 Element: AGACTGGCACTGTCTCAATAGTATATT Start: 827 Stop: 853  
 Pval: 0.000911335

Matched Sequence: YIL116W 6.63654e-05 HIS5  
 Element: AAATAATTAATGACTAATCCGAAGTTA Start: 657 Stop: 683  
 Pval: 0.000161502  
 Element: TCCTGGACAGTAATAACAGAAGCC Start: 554 Stop: 580  
 Pval: 0.00036338  
 Element: TTGGATCTGTTGACTCACTTCAATTGA Start: 789 Stop: 815  
 Pval: 0.00042106  
 Element: ACCTGTTTGATGACTACTTCATCAATT Start: 422 Stop: 448  
 Pval: 0.00061717  
 Element: GAATCTGAGATGACTAACTACCAATT Start: 718 Stop: 744  
 Pval: 0.000790208  
 Element: TCAATTGAAGTGAGTCAACAGATCCAA Start: 815 Stop: 789  
 Pval: 0.000807512  
 Element: TAACTTCGGATTAGTCATTAATTATTT Start: 683 Stop: 657  
 Pval: 0.00084212  
 Element: CCCTGGGCGCTGTGCGATTAAGAATAT Start: 47 Stop: 73  
 Pval: 0.000865192

Matched Sequence: YER090W 9.66501e-05 TRP2  
 Element: AGTGATTTGCTGACTCATTACGATTTT Start: 829 Stop: 855  
 Pval: 1.73038e-05  
 Element: ACTCCGGTGCTGACTCCTTGACCGCGT Start: 349 Stop: 323  
 Pval: 2.30718e-05  
 Element: CTAGAATGTGTGAATCCTCCATTGACA Start: 266 Stop: 292  
 Pval: 0.000415292  
 Element: AAAATCGTAATGAGTCAGCAAATCACT Start: 855 Stop: 829  
 Pval: 0.000432596  
 Element: CCAAGGGCTTTGATTGATACTTTCATA Start: 116 Stop: 90  
 Pval: 0.000530651  
 Element: TTACGATTTTTCACTCATCGAAGTATT Start: 846 Stop: 872  
 Pval: 0.000582562  
 Element: CCTAGGATTTTACTATTCCATTGTTG Start: 449 Stop: 423  
 Pval: 0.000709457

Matched Sequence: YOL140W 9.78705e-05 ARG8  
 Element: GCTCGCTATGTGACTCACTTAAAGTAC Start: 811 Stop: 837  
 Pval: 1.73038e-05  
 Element: TGTAAAAGTGTGACACATTCTTGCTAC Start: 30 Stop: 4  
 Pval: 0.000115359  
 Element: GACTTTAAGTGAGTCACATAGCGAGC Start: 837 Stop: 811  
 Pval: 0.000432596  
 Element: TGTTAGCGTCTCACTCAGCGGATCAAG Start: 609 Stop: 583  
 Pval: 0.000484507

|                                            |            |           |
|--------------------------------------------|------------|-----------|
| Element: TATGGGAAGATCACTCACTAATGCTTG       | Start: 632 | Stop: 658 |
| Pval: 0.000484507                          |            |           |
| Element: TTTGGATCAGTGACTAATGTAGGTCTT       | Start: 730 | Stop: 756 |
| Pval: 0.000484507                          |            |           |
| Element: CCTACATTAGTCACTGATCCAAAGCCG       | Start: 752 | Stop: 726 |
| Pval: 0.000899799                          |            |           |
| Element: CCAATTACGGTGATTAAGAAGCTCCAG       | Start: 439 | Stop: 465 |
| Pval: 0.000911335                          |            |           |
| Matched Sequence: YER073W 0.00012006 x     |            |           |
| Element: GGAAGACTTCTGACTCATCACTACGCA       | Start: 764 | Stop: 790 |
| Pval: 0                                    |            |           |
| Element: AAAAGAAAGATGCCTCATCGAAATTAA       | Start: 425 | Stop: 399 |
| Pval: 9.22871e-05                          |            |           |
| Element: TGCGTAGTGATGAGTCAGAAGTCTTCC       | Start: 790 | Stop: 764 |
| Pval: 0.000259557                          |            |           |
| Element: ATACGATAAGTGTCTCATCAAACGTGG       | Start: 923 | Stop: 949 |
| Pval: 0.000294165                          |            |           |
| Element: CCACGTTTGTGAGACACTTATCGTAT        | Start: 949 | Stop: 923 |
| Pval: 0.00036338                           |            |           |
| Element: GTCCTTATGATGACAGATTGGGGCCCA       | Start: 55  | Stop: 81  |
| Pval: 0.000726761                          |            |           |
| Element: TAAGCGTGGGTTACGCACAAACTGTAT       | Start: 187 | Stop: 213 |
| Pval: 0.000732529                          |            |           |
| Matched Sequence: YHR018C 0.000219873 ARG4 |            |           |
| Element: AGTAGATGAATGACTCACTTTTTGGAT       | Start: 812 | Stop: 838 |
| Pval: 1.73038e-05                          |            |           |
| Element: CTTGTGGTGGTTACTCATTGGCAGAAT       | Start: 769 | Stop: 795 |
| Pval: 4.61436e-05                          |            |           |
| Element: CCTGTTGTGTGACAGATTCCTGTCA         | Start: 436 | Stop: 462 |
| Pval: 8.07512e-05                          |            |           |
| Element: ATCCAAAAGTGAGTCATTCATCTACT        | Start: 838 | Stop: 812 |
| Pval: 0.000259557                          |            |           |
| Element: ACAGTGAATCTGTACACAACCAGGCT        | Start: 460 | Stop: 434 |
| Pval: 0.00042106                           |            |           |
| Element: ATTCTGCCAATGAGTAACCACCACAAG       | Start: 795 | Stop: 769 |
| Pval: 0.000767137                          |            |           |
| Element: CGCCTACTACTGGTTCATTGACCAAAG       | Start: 353 | Stop: 379 |
| Pval: 0.000801744                          |            |           |
| Matched Sequence: YJR111C 0.000266454 x    |            |           |
| Element: AAAAAATGTGTGACTAATAATTACTCA       | Start: 833 | Stop: 859 |
| Pval: 0.000184574                          |            |           |
| Element: ACTTGTGTACTGACTTACACATACATA       | Start: 885 | Stop: 911 |
| Pval: 0.000259557                          |            |           |
| Element: TGAATAATAATTACTCAACGAAGCATA       | Start: 843 | Stop: 869 |
| Pval: 0.000403756                          |            |           |
| Element: TCAGTTCGTCCAACCTATTTAGTTTCT       | Start: 413 | Stop: 439 |
| Pval: 0.000530651                          |            |           |
| Element: CGAGAATGGTTAACTCACATGGAATAC       | Start: 682 | Stop: 656 |
| Pval: 0.000530651                          |            |           |
| Element: TGAGTAATTATTAGTCACACATTTTTT       | Start: 859 | Stop: 833 |
| Pval: 0.000622938                          |            |           |
| Matched Sequence: YER175C 0.000367227 x    |            |           |
| Element: TTGATGTTTCATGACTCACAGTAATATC      | Start: 821 | Stop: 847 |



Pval: 4.61436e-05  
 Element: ACATAAGGTGTGATTCATTTATAGTAA Start: 819 Stop: 793  
 Pval: 8.07512e-05  
 Element: TATGTCAATATGACTTACTGAGAACAT Start: 435 Stop: 409  
 Pval: 0.000155734  
 Element: GATATTACTGTGAGTCATGAACATCAA Start: 847 Stop: 821  
 Pval: 0.00042106  
 Element: TTACTATAAATGAATCACACCTTATGT Start: 793 Stop: 819  
 Pval: 0.000444132  
 Element: ACGTTTGTGTTTACTAAAACAGATAAA Start: 670 Stop: 696  
 Pval: 0.000657546

Matched Sequence: YGR065C 0.000367227 x  
 Element: AAAATCTGCATGACTCTTACGGCTATA Start: 882 Stop: 908  
 Pval: 0.000115359  
 Element: GGACTAATGATTACTCAACGTTCTTCT Start: 347 Stop: 373  
 Pval: 0.00022495  
 Element: ACCGCCTCCGAGACTCTTTCACCCAAC Start: 771 Stop: 797  
 Pval: 0.00022495  
 Element: CATCCTAAAGTGATTCATAATCTCAGA Start: 750 Stop: 724  
 Pval: 0.000294165  
 Element: TCTGAGATTATGAATCACTTTAGGATG Start: 724 Stop: 750  
 Pval: 0.000484507  
 Element: CCTCTGTAAACGAATCATCAATTCAAG Start: 182 Stop: 156  
 Pval: 0.000657546

Matched Sequence: YMR096W 0.000413335 SNZ1  
 Element: TTCATGACTCTGACACACTCTGCCGCA Start: 818 Stop: 844  
 Pval: 8.07512e-05  
 Element: CATGACATAATGACTCAGCCGACAAGG Start: 737 Stop: 763  
 Pval: 0.000103823  
 Element: CCTTGTCGGCTGAGTCATTATGTCATG Start: 763 Stop: 737  
 Pval: 0.000126895  
 Element: TGCCGTTTACTGACTCAGTTGGAATTT Start: 686 Stop: 712  
 Pval: 0.000173038  
 Element: CATTTCTTCATGACTCTGACACACTCT Start: 812 Stop: 838  
 Pval: 0.000288397  
 Element: CTAGTTGGAATAGCTCATCATGACATA Start: 719 Stop: 745  
 Pval: 0.000547955  
 Element: AAATTCCAACGAGTCAGTAAACGGCA Start: 712 Stop: 686  
 Pval: 0.000882495

Matched Sequence: YOR130C 0.000437947 ARG11  
 Element: TTCTGCATCGTGACTCACCTTGAGCTC Start: 760 Stop: 786  
 Pval: 2.30718e-05  
 Element: AAAAATCAACTCACTCATCGACTGATA Start: 309 Stop: 283  
 Pval: 0.000115359  
 Element: ACGAATTGTATGACTCGTATACATAAC Start: 430 Stop: 404  
 Pval: 0.000230718  
 Element: ACATTTAATGTGACGAATTGTATGACT Start: 442 Stop: 416  
 Pval: 0.000438364  
 Element: TTCGTGCTAAGTACTCATTGTATCCAT Start: 706 Stop: 680  
 Pval: 0.000484507

Matched Sequence: YJL200C 0.000496411 x  
 Element: TTCACGCTCTTGAGTCATCGCGAGTAA Start: 758 Stop: 784  
 Pval: 0.000155734

Element: ACAGTGCTTATTACTCTCACATCAACA Start: 539 Stop: 565  
 Pval: 0.000190342  
 Element: TTACATTTGATGACTGATTCTCAATCT Start: 242 Stop: 268  
 Pval: 0.00025379  
 Element: TTACTIONGCGATGACTCAAGAGCGTGAA Start: 784 Stop: 758  
 Pval: 0.000259557  
 Element: AGATTGAGAATCAGTCATCAAATGTAA Start: 268 Stop: 242  
 Pval: 0.000438364  
 Element: AATACGACTATTCCCTCATTCCGTTTTTC Start: 166 Stop: 192  
 Pval: 0.000692153

Matched Sequence: YMR094W 0.000555231 CTF13  
 Element: GGACTIONTCTGGGGACTCACAGTCAGCTT Start: 990 Stop: 964  
 Pval: 1.73038e-05

Matched Sequence: YJR137C 0.000555231 ECM17  
 Element: CGCATCTCCATGACTCAAATTTTCCAG Start: 803 Stop: 777  
 Pval: 1.73038e-05

Matched Sequence: YGL180W 0.000576019 APG1  
 Element: TGCACATCAATGACTAATACCACTGTA Start: 213 Stop: 239  
 Pval: 4.61436e-05  
 Element: ATAGAGAATATGACTAATTCTGGTATA Start: 161 Stop: 135  
 Pval: 8.07512e-05

Matched Sequence: YDL066W 0.000690297 IDP1  
 Element: GCGCGGATTTTGACTIONCACATAATTCCA Start: 883 Stop: 909  
 Pval: 4.03756e-05  
 Element: CAAAAGAGCTTGAATCATTCCTTTTAT Start: 808 Stop: 834  
 Pval: 0.000259557  
 Element: AATCCGCGCGTGACCCGTAAAGCGTTA Start: 891 Stop: 865  
 Pval: 0.00036338  
 Element: ATGTCCATGATGACTCTTCTCTTGATC Start: 510 Stop: 536  
 Pval: 0.000374916  
 Element: TAAGAGGCCATGACACCCCGAGGGAG Start: 471 Stop: 497  
 Pval: 0.000628706  
 Element: ATATAAAGAGGGACTCATATGATCTTA Start: 917 Stop: 943  
 Pval: 0.000732529

Matched Sequence: YGL125W 0.000701029 MET11  
 Element: ACGTCCAGTATGACTCAGAAAAGTTG Start: 608 Stop: 634  
 Pval: 8.07512e-05  
 Element: AGGATAGAATGACTAAACGACGGCCC Start: 713 Stop: 687  
 Pval: 0.000115359  
 Element: CAACTTTTCTGAGTCATACTGGACGT Start: 634 Stop: 608  
 Pval: 0.000155734  
 Element: TATGCAACTTTGACTCAAATTTTCCA Start: 739 Stop: 765  
 Pval: 0.000190342  
 Element: CGTCGTGCACTIONGGCTCACTIONTGTACGCG Start: 240 Stop: 266  
 Pval: 0.000530651

Matched Sequence: YPR058W 0.000701029 YMC1  
 Element: TTACTIONTTGATTGACTCATTCTTACATT Start: 795 Stop: 821  
 Pval: 2.30718e-05  
 Element: AATGTAAGAATGAGTCAATCAAAGTAA Start: 821 Stop: 795  
 Pval: 0.000328773  
 Element: TATTCTGCCGTGACTCTTTCCGGGTGTA Start: 538 Stop: 512

Pval: 0.000369148  
 Element: GCGACGGTGTTGACTAATGCCTACGAG Start: 24 Stop: 50  
 Pval: 0.000484507  
 Element: TCTTCGCCATTCTCATCAATCTGAA Start: 234 Stop: 208  
 Pval: 0.000530651

Matched Sequence: YBR147W 0.000813863 x  
 Element: CTTGCAGCAATGACTCAAATTCATTG Start: 769 Stop: 795  
 Pval: 6.92153e-05  
 Element: CGTGCATGATTGATTGAGCCTGACCCG Start: 373 Stop: 347  
 Pval: 0.000259557  
 Element: CAATGGAATTTGAGTCATTGCTGCAAG Start: 795 Stop: 769  
 Pval: 0.000455668  
 Element: AGTGGATACATGATTGATTCTCTGTCT Start: 284 Stop: 258  
 Pval: 0.000594098  
 Element: CGGGTCAGGCTGAATCAATCATGCACG Start: 347 Stop: 373  
 Pval: 0.000669082  
 Element: ATGGCGTGCATGATTGATTGAGCCTGA Start: 377 Stop: 351  
 Pval: 0.000894031  
 Element: TCAGGCTGAATCAATCATGCACGCCAT Start: 351 Stop: 377  
 Pval: 0.000980551

Matched Sequence: YIR034C 0.000980541 LYS1  
 Element: GAGTCTTTTTTACTCATCGACTTAGT Start: 767 Stop: 741  
 Pval: 8.07512e-05  
 Element: TCTTCAAGGGTGCCTCAGACCTGGCTA Start: 73 Stop: 47  
 Pval: 0.000201878  
 Element: TCAGCGACAAAGAGTCATAAAGTCATC Start: 856 Stop: 882  
 Pval: 0.000259557  
 Element: CACTTCGCCATGACTCTGGCCAACGAG Start: 421 Stop: 447  
 Pval: 0.000403756  
 Element: GATGACTTTATGACTCTTTGTCGCTGA Start: 882 Stop: 856  
 Pval: 0.000484507  
 Element: ACTAAGTCGATGAGTCAAAAAGACTC Start: 741 Stop: 767  
 Pval: 0.000778672

Matched Sequence: YPR145W 0.00122649 ASN1  
 Element: CCACTCGAGATGACAAATAGTTCGTTTC Start: 805 Stop: 831  
 Pval: 4.03756e-05  
 Element: ATGTAACATTTGACTCATTCTGTAAAC Start: 764 Stop: 790  
 Pval: 8.07512e-05  
 Element: ACAGATGAGATGACTACTCCCAAGTCA Start: 335 Stop: 309  
 Pval: 0.000155734  
 Element: ACAGGCCTATGACTGTTATCATTGG Start: 691 Stop: 717  
 Pval: 0.000397988

Matched Sequence: YGL202W 0.00130596 ARO8  
 Element: AGATTAAACATGGCTCATATACCCAT Start: 563 Stop: 589  
 Pval: 7.49833e-05  
 Element: GTCCAATCTATGACTAATATTAAGCGC Start: 783 Stop: 809  
 Pval: 0.000155734  
 Element: ACCCTGCAGTTGATACAGACATTGAAT Start: 952 Stop: 978  
 Pval: 0.000397988  
 Element: GCGCTTAATATTAGTCATAGATTGGAC Start: 809 Stop: 783  
 Pval: 0.000403756

Matched Sequence: YOL064C 0.00158682 MET22

|                                           |            |           |
|-------------------------------------------|------------|-----------|
| Element: AATGCGGAATGACTCAGACGAGCAAT       | Start: 837 | Stop: 863 |
| Pval: 0                                   |            |           |
| Element: ATTGCTCGTCTGAGTCATTCGCGCATT      | Start: 863 | Stop: 837 |
| Pval: 0.00019611                          |            |           |
| Element: TTCTTTGATGTGACACACAAAATTTAT      | Start: 404 | Stop: 378 |
| Pval: 0.00025379                          |            |           |
| Element: CCGGTACTGCTGACTCTAATAACCGCT      | Start: 183 | Stop: 157 |
| Pval: 0.000403756                         |            |           |
| Element: GAAGAAACCATGCCACATATAAAGAAC      | Start: 898 | Stop: 924 |
| Pval: 0.000582562                         |            |           |
| Element: TTCATTACTAAGACTAACAGAGTACAG      | Start: 443 | Stop: 469 |
| Pval: 0.000847888                         |            |           |
| Matched Sequence: YIL165C 0.00172956 x    |            |           |
| Element: CAGGCCTCCGTGACTCATAAAGGGCAG      | Start: 270 | Stop: 296 |
| Pval: 0                                   |            |           |
| Element: TGCGCACAACTGACTAATTTCTGGATA      | Start: 676 | Stop: 650 |
| Pval: 0.00019611                          |            |           |
| Element: GGTGATATTATGACTTAGGGTTAGCCA      | Start: 332 | Stop: 358 |
| Pval: 0.000415292                         |            |           |
| Element: CTGCCCTTTATGAGTCACGGAGGCCTG      | Start: 296 | Stop: 270 |
| Pval: 0.000484507                         |            |           |
| Element: CGAAGGCCACCGACGCATCCTTATGTG      | Start: 681 | Stop: 707 |
| Pval: 0.000634474                         |            |           |
| Matched Sequence: YDL198C 0.00197283 YHM1 |            |           |
| Element: AAATGCACAGTGACTCACGAGTTTTTG      | Start: 861 | Stop: 835 |
| Pval: 0.000173038                         |            |           |
| Element: CAAAAACTCGTGAGTCACTGTGCATTT      | Start: 835 | Stop: 861 |
| Pval: 0.00022495                          |            |           |
| Element: TAAACCTTGATTACTCATCAAGGAAAT      | Start: 367 | Stop: 393 |
| Pval: 0.00042106                          |            |           |
| Element: ACTCCTCCTGTGGCACAAAGCTTGGCG      | Start: 576 | Stop: 602 |
| Pval: 0.000444132                         |            |           |
| Matched Sequence: YJL088W 0.00206411 ARG3 |            |           |
| Element: CTCCTTCGTATTACTCATTAGCTCTT       | Start: 931 | Stop: 957 |
| Pval: 0                                   |            |           |
| Element: AATCGTATGGTGACGCATCTAGGAAAT      | Start: 543 | Stop: 517 |
| Pval: 0.000230718                         |            |           |
| Element: AGACAATCCATTACTCACAAGAAGAGC      | Start: 352 | Stop: 378 |
| Pval: 0.000288397                         |            |           |
| Element: GCTCTTCTTGTGAGTAATGGATTGTCT      | Start: 378 | Stop: 352 |
| Pval: 0.000415292                         |            |           |
| Element: TAAGTGATAATGACCAATTGTTTAAAT      | Start: 192 | Stop: 166 |
| Pval: 0.000657546                         |            |           |
| Matched Sequence: YBR145W 0.00213048 ADH5 |            |           |
| Element: ACATGCTTTTTGACTCATCCTTCCGCG      | Start: 790 | Stop: 764 |
| Pval: 5.76794e-06                         |            |           |
| Element: CGCGGAAGGATGAGTCAAAAAGCATGT      | Start: 764 | Stop: 790 |
| Pval: 0.000259557                         |            |           |
| Element: ACTGCTTTACTGTCTCACAATGTCTCT      | Start: 918 | Stop: 944 |
| Pval: 0.000259557                         |            |           |
| Element: AGTGTCTTCATGACGGATTCATAGTCT      | Start: 514 | Stop: 540 |
| Pval: 0.000530651                         |            |           |
| Element: AATGTTCTGTTGGCTCACATACGTGCT      | Start: 172 | Stop: 198 |

Pval: 0.000634474  
 Element: CCGCGAAAAATGACTGATGTCTACAGG Start: 615 Stop: 641  
 Pval: 0.000894031

Matched Sequence: YHR029C 0.00213048 x  
 Element: TGTCTATAGATGACTAATCATAAATGA Start: 910 Stop: 884  
 Pval: 0.000248022  
 Element: TAATAGCGGTTGTCTCACAAACAGCCT Start: 318 Stop: 292  
 Pval: 0.000357613  
 Element: GATGCTCCAGGGCCTCATCCACGGTAA Start: 163 Stop: 137  
 Pval: 0.000438364  
 Element: ACTTCCCCGGTTACTTATAGTTTTTTG Start: 701 Stop: 675  
 Pval: 0.000720993  
 Element: TCCAGTGGCAGGTCTCATCTCCATCAT Start: 579 Stop: 553  
 Pval: 0.000894031  
 Element: TGTCTAAATATGACACAAGGAAGATAA Start: 948 Stop: 974  
 Pval: 0.000894031

Matched Sequence: YBR256C 0.00293419 RIB5  
 Element: ATCTGGAATATGACTAATAGATAGTTC Start: 923 Stop: 897  
 Pval: 4.03756e-05

Matched Sequence: YJR010W 0.00300042 MET3  
 Element: TGTAATTTTGTAACCTACCGCATTCTA Start: 645 Stop: 671  
 Pval: 0.000276861  
 Element: AGTACAGATATGACACACTTGTAGCGC Start: 559 Stop: 585  
 Pval: 0.000340309  
 Element: TCTGAGCATCTTACTCAGTTTCAAGAT Start: 300 Stop: 274  
 Pval: 0.000738297  
 Element: AGAGCCTCTATTTCTCATTGGTAAGTA Start: 806 Stop: 780  
 Pval: 0.000859424  
 Element: ATCCCTTCCGTGATTTATACAAAAGAA Start: 389 Stop: 363  
 Pval: 0.000917103  
 Element: ATTTTCTTATAAATCATCCCTTCCGT Start: 405 Stop: 379  
 Pval: 0.000951711

Matched Sequence: YDL182W 0.00311329 LYS20  
 Element: CCCGATCAGCTGGCTCATCGTTATTCT Start: 363 Stop: 389  
 Pval: 4.03756e-05  
 Element: TCCTCTCTTATGACTAATGCACTCAGC Start: 303 Stop: 329  
 Pval: 5.76794e-05  
 Element: CATTGTGACATTACTATTTTTTTGGC Start: 653 Stop: 627  
 Pval: 0.000403756  
 Element: CGGCGGAATTTGACGCAGACGTAACAT Start: 433 Stop: 407  
 Pval: 0.000530651  
 Element: AATTAAGTACTGACTGATGTTACGTCT Start: 391 Stop: 417  
 Pval: 0.000715225

Matched Sequence: YCL030C 0.00331601 HIS4  
 Element: CCATGCACAGTACTCACGTTTTTTTA Start: 792 Stop: 818  
 Pval: 4.03756e-05  
 Element: TGCTGTATTATGACCCATCGTATCGCA Start: 693 Stop: 667  
 Pval: 5.76794e-05  
 Element: CTATATCGAATGACTGATAAAAAACG Start: 835 Stop: 809  
 Pval: 0.000357613  
 Element: GCAGTCGAACTGACTCTAATAGTACT Start: 736 Stop: 762  
 Pval: 0.000501811

Matched Sequence: YER069W 0.00352605 ARG5,6  
 Element: GCTGCAAGAATGACTAATTCATAGAAA Start: 637 Stop: 663  
 Pval: 1.73038e-05  
 Element: CTTATCCGAATGACTCAGTCTACATCA Start: 768 Stop: 794  
 Pval: 3.46077e-05  
 Element: TGATGTAGACTGAGTCATTCGGATAAG Start: 794 Stop: 768  
 Pval: 0.000426828  
 Element: TGGTAATTGATGACTCTTCTATTTTTT Start: 814 Stop: 840  
 Pval: 0.000484507  
 Element: ACACCAACATTGACACTCTGCAAGAAT Start: 166 Stop: 140  
 Pval: 0.000963247  
 Element: CTTGCAGCGCTGACGCTTTCATACGTT Start: 644 Stop: 618  
 Pval: 0.000980551

Matched Sequence: YJL213W 0.00363908 x  
 Element: CATGTCGGCATGACGCATTATCTCCAT Start: 419 Stop: 445  
 Pval: 4.03756e-05  
 Element: CAAATTAGTGTTACTTATACAGTAATT Start: 784 Stop: 758  
 Pval: 0.000484507  
 Element: AGACCTGGAGTGACATACTTACCGGTG Start: 942 Stop: 916  
 Pval: 0.000484507  
 Element: ACCTTGAAATGACACCCTGTTCTATG Start: 855 Stop: 829  
 Pval: 0.000905567  
 Element: GAAGAATTCATTACTAATAGAGAAAAA Start: 281 Stop: 307  
 Pval: 0.000922871  
 Element: AGTTTTTCTTGACACACTTCACAGAT Start: 381 Stop: 407  
 Pval: 0.000986318

Matched Sequence: YCL009C 0.00363908 ILV6  
 Element: ACCGTTATCGTGACTCACTTTCTTTTCG Start: 841 Stop: 867  
 Pval: 0  
 Element: CCTCTCTGTATAACTCATTGACTACGG Start: 409 Stop: 383  
 Pval: 4.03756e-05  
 Element: CCTTGTGCGATGGCACATCCAACGAAT Start: 808 Stop: 834  
 Pval: 8.07512e-05  
 Element: CTCGTGTAAGAGACTCATTAATTCTTG Start: 155 Stop: 129  
 Pval: 0.000149967  
 Element: ACATCTGAGCTCACTAACCCAGTCTTT Start: 971 Stop: 997  
 Pval: 0.000484507  
 Element: GCACATCCAACGAATCACCTCACCGTT Start: 820 Stop: 846  
 Pval: 0.000986318

Matched Sequence: YOL119C 0.00447878 x  
 Element: GATTCGCCTGTGACTCTTTGCCATCTC Start: 867 Stop: 841  
 Pval: 4.61436e-05  
 Element: TAGGCACGGCTGACTAATTTGAAGCTA Start: 821 Stop: 795  
 Pval: 0.00022495  
 Element: CCTGAGTTTCTGACCTATAGAGCCCCA Start: 742 Stop: 716  
 Pval: 0.000334541

Matched Sequence: YLR267W 0.00519127 x  
 Element: GGTACAACAATGACTCAGAAATCATGA Start: 743 Stop: 717  
 Pval: 8.07512e-05  
 Element: TACACATTGCTGACACATAGGCCTGGC Start: 358 Stop: 384  
 Pval: 0.000369148  
 Element: TCATGATTTCTGAGTCATTGTTGTACC Start: 717 Stop: 743

Pval: 0.000426828  
Element: AGTTTTCTAATTACACATTGCTGACAC Start: 347 Stop: 373  
Pval: 0.00061717  
Element: CCGCTGTTAATGCCTCTTCATGATTTTC Start: 700 Stop: 726  
Pval: 0.000795976  
  
Matched Sequence: YGL224C 0.00593703 x  
Element: ATTTGATCGATGACTAATTGCAAGAGA Start: 724 Stop: 698  
Pval: 0.000155734  
Element: CAAGAGTTTAAGACTCAGATCTCATCC Start: 600 Stop: 626  
Pval: 0.000259557  
Element: TCTCTTGCAATTAGTCATCGATCAAAT Start: 698 Stop: 724  
Pval: 0.000374916  
Element: CACTTGATGATGATGCATTGAAACAAT Start: 409 Stop: 435  
Pval: 0.000726761  
Element: TGATATCATATTACTCCCCATTTTAC Start: 917 Stop: 943  
Pval: 0.000819048  
  
Matched Sequence: YDL170W 0.00633783 UGA3  
Element: TTAGTGAATATGACACATCGTGGTGCC Start: 92 Stop: 66  
Pval: 1.73038e-05  
Element: TTTTCTTTGATGACTCAGACCCTGGTA Start: 905 Stop: 879  
Pval: 2.30718e-05  
Element: TACCAGGGTCTGAGTCATCAAAGAAAA Start: 879 Stop: 905  
Pval: 0.000288397  
Element: CCAATCGGATTGACGCATTAACCGA Start: 805 Stop: 831  
Pval: 0.000346077  
Element: AACTTATGAATGACTAAGAAAAGCAGT Start: 673 Stop: 699  
Pval: 0.000830584  
  
Matched Sequence: YGL009C 0.00675793 LEU1  
Element: TTAGTCTAGATGACTCAGTTTAGTCTG Start: 690 Stop: 716  
Pval: 0.000155734  
Element: AGAACTTAACTCACTCATCACGCTGTT Start: 870 Stop: 896  
Pval: 0.000259557  
Element: CAGACTAACTGAGTCATCTAGAGTAA Start: 716 Stop: 690  
Pval: 0.000438364  
Element: CTATTGAAGCCGACTCATGAAGCCGGT Start: 845 Stop: 819  
Pval: 0.000582562  
Element: CAGCAGAACTTAACTCACTCATCACGC Start: 866 Stop: 892  
Pval: 0.00084212  
  
Matched Sequence: YDR158W 0.00890077 HOM2  
Element: AAGCATTGATTGACTCATTTCCTCTG Start: 807 Stop: 833  
Pval: 0.000109591  
Element: GTCGCCGCTGTGGCTAACACCAGCCTC Start: 370 Stop: 396  
Pval: 0.00042106  
Element: GCTACAGGTCTCACTCATCGCGAATG Start: 592 Stop: 566  
Pval: 0.0004499  
Element: CAGAGGAAAATGAGTCAATCAATGCTT Start: 833 Stop: 807  
Pval: 0.000501811  
Element: ACGCCTGTGGTCATTCATGCCACGCAG Start: 220 Stop: 246  
Pval: 0.000894031  
  
Matched Sequence: YJR109C 0.00943603 CPA2  
Element: GTTGAGAAAATGACTCATCCACCACTG Start: 645 Stop: 671  
Pval: 0

|                                      |                          |            |           |
|--------------------------------------|--------------------------|------------|-----------|
| Element: ACAATTGTGGTGA               | CTCAAGATCAAAT            | Start: 210 | Stop: 236 |
| Pval: 5.76794e-06                    |                          |            |           |
| Element: CAGTGGTGGATGAGTCATTTCTCAAC  |                          | Start: 671 | Stop: 645 |
| Pval: 0.000173038                    |                          |            |           |
| Element: TTATTGTGAATGACTCTTATTGATGAG |                          | Start: 698 | Stop: 724 |
| Pval: 0.000369148                    |                          |            |           |
| Element: TTA                         | CTCAAGGTGACACAATCGTTACGA | Start: 792 | Stop: 766 |
| Pval: 0.000905567                    |                          |            |           |
