# Supplementary material
Source: PubMed Central journal article supplement (PMC373293)
Supplement: nar_32_1_179__6.pdf [file nar_32_1_179__6.pdf]

ROVER Output:

Sequence Pvalue Cutoff: 0.01

Site Pvalue Cutoff: 0.001

| Matrix | Pvalue      |                   |
|--------|-------------|-------------------|
| M00199 | 6.10387e-71 | AP1               |
| M00038 | 2.68489e-40 | GCN4              |
| M00713 | 1.53129e-35 | TBP               |
| M00204 | 1.00355e-19 | GCN4              |
| M00064 | 0.0011602   | PHO4              |
| M00732 | 0.00135264  | CAT8              |
| M00303 | 0.00193237  | CBF1              |
| M00752 | 0.0168596   | PDR3              |
| M00683 | 0.052534    | XBP1              |
| M00048 | 0.0635609   | ADR1              |
| M00728 | 0.118765    | ROX1              |
| M00276 | 0.136214    | Mat1-Mc           |
| M00307 | 0.21154     | REB1              |
| M00306 | 0.281842    | LEU3              |
| M00197 | 0.334489    | ABF1              |
| M00198 | 0.36188     | GAL4              |
| M00275 | 0.389276    | MAT1-Mc           |
| M00753 | 0.390826    | RCS1              |
| M00031 | 0.391428    | MATalpha2         |
| M00288 | 0.419825    | HAP2/3/5          |
| M00046 | 0.44577     | GCR1              |
| M00305 | 0.449923    | HAP1              |
| M00308 | 0.541676    | STRE              |
| M00169 | 0.599852    | HSF               |
| M00337 | 0.599852    | GCR1              |
| M00014 | 0.629345    | repressor of CAR1 |
| M00703 | 0.629345    | TAF               |
| M00730 | 0.629345    | HAC1              |
| M00030 | 0.657023    | MATalpha1         |
| M00754 | 0.736841    | ZAP1              |
| M00167 | 0.738652    | HSF               |
| M00061 | 0.808372    | MIG1              |
| M00274 | 0.910805    | STE11             |
| M00029 | 0.917083    | HSF               |
| M00168 | 0.931977    | HSF               |
| M00759 | 0.951363    | MCM1+SFF          |
| M00170 | 0.964585    | HSF               |
| M00049 | 0.965008    | GAL4              |
| M00664 | 0.966817    | STE12             |
| M00125 | 0.970351    | MCM1              |
| M00207 | 0.976007    | LAC9              |
| M00015 | 0.980494    | ABF1              |
| M00213 | 0.999407    | RAP1              |
