# Supplementary material
Source: PubMed Central journal article supplement (PMC373293)
Supplement: nar_32_1_179__8.pdf [file nar_32_1_179__8.pdf]

ROVER Output:  
Sequence Pvalue Cutoff: 0.01  
Site Pvalue Cutoff: 0.001

Matrix: PH04      Accessions(YFR034C)

Binomial p-value: 3.06384e-17

Matched Sequence: YML123C      3.96918e-07 PH084  
Element: CAGCACGTGGGG      Start: 584      Stop: 595      Pval: 0  
Element: ACGCACGTTGGT      Start: 411      Stop: 422      Pval: 5.61735e-05  
Element: TTCCACGTGGAC      Start: 562      Stop: 573      Pval: 5.61735e-05  
Element: CCCCACGTGCTG      Start: 595      Stop: 584      Pval: 5.61735e-05  
Element: GTCCACGTGGAA      Start: 573      Stop: 562      Pval: 0.00016852  
Element: ACGCACGTTTTT      Start: 747      Stop: 736      Pval: 0.00016852  
Element: TAACACGTCCAC      Start: 579      Stop: 568      Pval: 0.000505561  
Element: AAAAACGTGCGT      Start: 736      Stop: 747      Pval: 0.000730255  
Element: ACCAACGTGCGT      Start: 422      Stop: 411      Pval: 0.000786429  
Element: TGTCACGTGATA      Start: 119      Stop: 130      Pval: 0.000842602  
Element: TGGCATGTTTTC      Start: 388      Stop: 377      Pval: 0.000898775

Matched Sequence: YAR071W      1.72006e-05 PH011  
Element: TCACACGTGGGT      Start: 715      Stop: 726      Pval: 0  
Element: TACCACGTTTTC      Start: 582      Stop: 593      Pval: 5.61735e-05  
Element: ACCCACGTGTGA      Start: 726      Stop: 715      Pval: 5.61735e-05  
Element: TTGCAAGTGCGA      Start: 216      Stop: 227      Pval: 0.000449388  
Element: TTACATGTGCGG      Start: 95      Stop: 84      Pval: 0.000505561  
Element: AACTCGTGGGG      Start: 106      Stop: 117      Pval: 0.000505561  
Element: CCCCACGAGTGT      Start: 117      Stop: 106      Pval: 0.000505561  
Element: TCGCACTTGCAA      Start: 227      Stop: 216      Pval: 0.000898775  
Element: GAAAACGTGGTA      Start: 593      Stop: 582      Pval: 0.000898775

Matched Sequence: YHR215W      1.72006e-05 PH012  
Element: TCACACGTGGGT      Start: 715      Stop: 726      Pval: 0  
Element: TACCACGTTTTC      Start: 580      Stop: 591      Pval: 5.61735e-05  
Element: ACCCACGTGTGA      Start: 726      Stop: 715      Pval: 5.61735e-05  
Element: TTGCAAGTGCGA      Start: 214      Stop: 225      Pval: 0.000449388  
Element: TTACATGTGCGG      Start: 93      Stop: 82      Pval: 0.000505561  
Element: AACTCGTGGGG      Start: 104      Stop: 115      Pval: 0.000505561  
Element: CCCCACGAGTGT      Start: 115      Stop: 104      Pval: 0.000505561  
Element: TCGCACTTGCAA      Start: 225      Stop: 214      Pval: 0.000898775  
Element: GAAAACGTGGTA      Start: 591      Stop: 580      Pval: 0.000898775

Matched Sequence: YHR136C      9.89166e-05 SPL2  
Element: ACGCACGTGGGC      Start: 851      Stop: 862      Pval: 0  
Element: GAGCACGTGGGA      Start: 919      Stop: 908      Pval: 0  
Element: TTGCACGTTCTT      Start: 106      Stop: 95      Pval: 5.61735e-05  
Element: GCCCACGTGCGT      Start: 862      Stop: 851      Pval: 5.61735e-05  
Element: TCCCACGTGCTC      Start: 908      Stop: 919      Pval: 5.61735e-05  
Element: AGGCACGTGGCT      Start: 978      Stop: 967      Pval: 0.00016852  
Element: AGCCACGTGCCT      Start: 967      Stop: 978      Pval: 0.000505561  
Element: GGTCACGTGAGC      Start: 648      Stop: 637      Pval: 0.000898775

Matched Sequence: YPL019C      0.000337665 x  
Element: AGCCACGTGGGC      Start: 664      Stop: 653      Pval: 0  
Element: AAGCACGTGCAT      Start: 687      Stop: 698      Pval: 5.61735e-05  
Element: ATGCACGTGCTT      Start: 698      Stop: 687      Pval: 0.00016852  
Element: GCCCACGTGGCT      Start: 653      Stop: 664      Pval: 0.000224694  
Element: TTCCACGTTTCT      Start: 731      Stop: 720      Pval: 0.000505561

|                           |               |           |                   |
|---------------------------|---------------|-----------|-------------------|
| Element: TGGCACATTTTT     | Start: 606    | Stop: 617 | Pval: 0.000842602 |
| Element: TCGCACATTGAA     | Start: 650    | Stop: 639 | Pval: 0.000842602 |
| Matched Sequence: YBR296C | 0.000465029 x |           |                   |
| Element: CAGCACGTGGGA     | Start: 675    | Stop: 686 | Pval: 0           |
| Element: CCCCACGTTGTG     | Start: 535    | Stop: 546 | Pval: 5.61735e-05 |
| Element: TCCCACGTGCTG     | Start: 686    | Stop: 675 | Pval: 5.61735e-05 |
| Element: CACAACGTGGGG     | Start: 546    | Stop: 535 | Pval: 0.000112347 |
| Element: CACTACGTTGTC     | Start: 73     | Stop: 84  | Pval: 0.000617908 |
| Element: AGCCACTTTGGA     | Start: 729    | Stop: 740 | Pval: 0.000674082 |
| Matched Sequence: YJL012C | 0.00977477 x  |           |                   |
| Element: CCGCACGTGGCT     | Start: 873    | Stop: 884 | Pval: 5.61735e-05 |
| Element: AGCCACGTGCGG     | Start: 884    | Stop: 873 | Pval: 5.61735e-05 |
| Element: ATTCACGTGTGC     | Start: 896    | Stop: 885 | Pval: 0.000505561 |
| Element: GCACACTTTGGG     | Start: 276    | Stop: 287 | Pval: 0.000898775 |
| Element: GCACACGTGAAT     | Start: 885    | Stop: 896 | Pval: 0.000898775 |
