# Supplementary material
Source: PubMed Central journal article supplement (PMC373293)
Supplement: nar_32_1_179__9.pdf [file nar_32_1_179__9.pdf]

ROVER Output:

Sequence Pvalue Cutoff: 0.01

Site Pvalue Cutoff: 0.001

| Matrix | Pvalue      |                   |
|--------|-------------|-------------------|
| M00064 | 3.06384e-17 | PHO4              |
| M00274 | 5.69813e-10 | STE11             |
| M00014 | 1.25109e-08 | repressor of CAR1 |
| M00306 | 1.78258e-05 | LEU3              |
| M00703 | 2.54359e-05 | TAF               |
| M00031 | 0.000371869 | MATalpha2         |
| M00305 | 0.00144041  | HAP1              |
| M00713 | 0.00408855  | TBP               |
| M00015 | 0.013081    | ABF1              |
| M00197 | 0.0151307   | ABF1              |
| M00759 | 0.022263    | MCM1+SFF          |
| M00049 | 0.0405698   | GAL4              |
| M00753 | 0.0405705   | RCS1              |
| M00303 | 0.0405708   | CBF1              |
| M00125 | 0.0891305   | MCM1              |
| M00198 | 0.0951677   | GAL4              |
| M00170 | 0.138426    | HSF               |
| M00308 | 0.138427    | STRE              |
| M00664 | 0.152728    | STE12             |
| M00207 | 0.194419    | LAC9              |
| M00307 | 0.194421    | REB1              |
| M00730 | 0.263601    | HAC1              |
| M00030 | 0.424035    | MATalpha1         |
| M00683 | 0.434038    | XBP1              |
| M00038 | 0.532308    | GCN4              |
| M00199 | 0.532308    | AP1               |
| M00046 | 0.536935    | GCR1              |
| M00213 | 0.628633    | RAP1              |
| M00337 | 0.632556    | GCR1              |
| M00728 | 0.632556    | ROX1              |
| M00168 | 0.632557    | HSF               |
| M00275 | 0.632557    | MAT1-Mc           |
| M00754 | 0.636863    | ZAP1              |
| M00276 | 0.719282    | Mat1-Mc           |
| M00288 | 0.799253    | HAP2/3/5          |
| M00752 | 0.824423    | PDR3              |
| M00048 | 0.865095    | ADR1              |
| M00732 | 0.950952    | CAT8              |
| M00029 | 0.956768    | HSF               |
| M00169 | 0.956769    | HSF               |
| M00204 | 0.978056    | GCN4              |
| M00167 | 0.987435    | HSF               |
| M00061 | 0.992387    | MIG1              |
