# Supplementary material
Source: PubMed Central journal article supplement (PMC373293)
Supplement: nar_32_1_179__11.pdf [file nar_32_1_179__11.pdf]

ROVER Output:  
Sequence Pvalue Cutoff: 0.01  
Site Pvalue Cutoff: 0.001

Matrix: STE12 Accessions(YHR084W)

Binomial p-value: 1.53649e-06

Matched Sequence: YBR040W 0.000181111 FIG1  
Element: ATGAAAC Start: 595 Stop: 601 Pval: 0.000136412  
Element: ATGAAAC Start: 790 Stop: 784 Pval: 0.000136412  
Element: ATGAAAC Start: 827 Stop: 833 Pval: 0.000136412

Matched Sequence: YFL026W 0.000181111 STE2  
Element: ATGAAAC Start: 450 Stop: 456 Pval: 0.000136412  
Element: ATGAAAC Start: 677 Stop: 683 Pval: 0.000136412  
Element: ATGAAAC Start: 803 Stop: 809 Pval: 0.000136412

Matched Sequence: YBR083W 0.00165418 TEC1  
Element: ATGAAAC Start: 906 Stop: 912 Pval: 0.000136412  
Element: TTGAAAC Start: 841 Stop: 847 Pval: 0.000298401  
Element: CTGAAAC Start: 499 Stop: 493 Pval: 0.000417761  
Element: CTGAAAC Start: 618 Stop: 612 Pval: 0.000417761

Matched Sequence: YER155C 0.00196551 BEM2  
Element: ATGAAAC Start: 466 Stop: 460 Pval: 0.000136412  
Element: CTGAAAC Start: 643 Stop: 649 Pval: 0.000298401  
Element: CTGAAAC Start: 927 Stop: 921 Pval: 0.000417761  
Element: GTGAAAC Start: 662 Stop: 668 Pval: 0.000434812

Matched Sequence: YHR084W 0.00196551 STE12  
Element: ATGAAAC Start: 565 Stop: 571 Pval: 0.000136412  
Element: TTGAAAC Start: 526 Stop: 532 Pval: 0.000298401  
Element: TTGAAAC Start: 563 Stop: 557 Pval: 0.000417761  
Element: GTGAAAC Start: 607 Stop: 613 Pval: 0.000434812

Matched Sequence: YBR012W-B 0.00271269 x  
Element: ATGAAAC Start: 508 Stop: 502 Pval: 0.000136412  
Element: ATGAAAC Start: 863 Stop: 869 Pval: 0.000136412

Matched Sequence: YCL019W 0.00271269 x  
Element: ATGAAAC Start: 715 Stop: 721 Pval: 0.000136412  
Element: ATGAAAC Start: 985 Stop: 979 Pval: 0.000136412

Matched Sequence: YLR040C 0.00271269 x  
Element: ATGAAAC Start: 98 Stop: 92 Pval: 0.000136412  
Element: ATGAAAC Start: 490 Stop: 496 Pval: 0.000136412

Matched Sequence: YMR046C 0.00271269 x  
Element: ATGAAAC Start: 524 Stop: 518 Pval: 0.000136412  
Element: ATGAAAC Start: 863 Stop: 869 Pval: 0.000136412

Matched Sequence: YCL055W 0.00315599 KAR4  
Element: ATGAAAC Start: 814 Stop: 808 Pval: 0.000136412  
Element: ATGAAAC Start: 886 Stop: 880 Pval: 0.000136412  
Element: TTGAAAC Start: 908 Stop: 902 Pval: 0.000417761  
Element: GTGAAAC Start: 863 Stop: 857 Pval: 0.000485967

Matched Sequence: YCL027W 0.00321903 FUS1

Element: ATGAAAC Start: 814 Stop: 820 Pval: 0.000136412  
Element: ATGAAAC Start: 825 Stop: 831 Pval: 0.000136412  
Element: TTGAAAC Start: 841 Stop: 847 Pval: 0.000298401

Matched Sequence: YCLX07W 0.00321903 x

Element: ATGAAAC Start: 639 Stop: 645 Pval: 0.000136412  
Element: ATGAAAC Start: 650 Stop: 656 Pval: 0.000136412  
Element: TTGAAAC Start: 666 Stop: 672 Pval: 0.000298401

Matched Sequence: YNL145W 0.00321903 MFA2

Element: ATGAAAC Start: 579 Stop: 573 Pval: 0.000136412  
Element: ATGAAAC Start: 805 Stop: 811 Pval: 0.000136412  
Element: TTGAAAC Start: 635 Stop: 641 Pval: 0.000298401
