# Supplementary material
Source: PubMed Central journal article supplement (PMC373293)
Supplement: nar_32_1_179__12.pdf [file nar_32_1_179__12.pdf]

ROVER Output:

Sequence Pvalue Cutoff: 0.01

Site Pvalue Cutoff: 0.001

| Matrix | Pvalue      |                   |
|--------|-------------|-------------------|
| M00664 | 1.53649e-06 | STE12             |
| M00125 | 0.000372883 | MCM1              |
| M00730 | 0.00175631  | HAC1              |
| M00274 | 0.00230544  | STE11             |
| M00337 | 0.00290744  | GCR1              |
| M00029 | 0.00358779  | HSF               |
| M00303 | 0.00607356  | CBF1              |
| M00728 | 0.016945    | ROX1              |
| M00276 | 0.0304133   | Mat1-Mc           |
| M00752 | 0.0334563   | PDR3              |
| M00759 | 0.0872086   | MCM1+SFF          |
| M00305 | 0.0995841   | HAP1              |
| M00049 | 0.142075    | GAL4              |
| M00064 | 0.142077    | PHO4              |
| M00288 | 0.163403    | HAP2/3/5          |
| M00046 | 0.195072    | GCR1              |
| M00204 | 0.209182    | GCN4              |
| M00038 | 0.211186    | GCN4              |
| M00683 | 0.212176    | XBP1              |
| M00015 | 0.239567    | ABF1              |
| M00275 | 0.268867    | MAT1-Mc           |
| M00030 | 0.268868    | MATalpha1         |
| M00207 | 0.298374    | LAC9              |
| M00031 | 0.329898    | MATalpha2         |
| M00753 | 0.332661    | RCS1              |
| M00213 | 0.333331    | RAP1              |
| M00308 | 0.358333    | STRE              |
| M00199 | 0.438877    | AP1               |
| M00198 | 0.475118    | GAL4              |
| M00014 | 0.512366    | repressor of CAR1 |
| M00306 | 0.512641    | LEU3              |
| M00167 | 0.586856    | HSF               |
| M00197 | 0.694419    | ABF1              |
| M00169 | 0.783443    | HSF               |
| M00754 | 0.795308    | ZAP1              |
| M00307 | 0.88164     | REB1              |
| M00048 | 0.897877    | ADR1              |
| M00732 | 0.924158    | CAT8              |
| M00703 | 0.952406    | TAF               |
| M00713 | 0.963511    | TBP               |
| M00168 | 0.968461    | HSF               |
| M00170 | 0.984132    | HSF               |
| M00061 | 0.993276    | MIG1              |
