# Supplementary material
Source: PubMed Central journal article supplement (PMC373293)
Supplement: nar_32_1_179__14.pdf [file nar_32_1_179__14.pdf]

ROVER Output:  
Sequence Pvalue Cutoff: 0.01  
Site Pvalue Cutoff: 0.001

Matrix: ROX1 Accessions (YPR065W)

Binomial p-value: 0.629708

Matched Sequence: YDR044W 0.000104376 HEM13  
Element: CCCATTGTT Start: 816 Stop: 824 Pval: 3.43658e-05  
Element: CGTATTGTT Start: 419 Stop: 411 Pval: 6.3004e-05  
Element: TGTATTGTT Start: 352 Stop: 344 Pval: 7.44593e-05  
Element: TCAATTGTT Start: 527 Stop: 535 Pval: 0.000229106  
Element: CCTATTGTC Start: 874 Stop: 882 Pval: 0.000274927  
Element: CCTTTTGTT Start: 293 Stop: 301 Pval: 0.00029211  
Element: TGCTTTGTT Start: 763 Stop: 755 Pval: 0.0007045

Matched Sequence: YPR065W 0.000973182 ROX1  
Element: CCTATTGTT Start: 605 Stop: 613 Pval: 1.14553e-05  
Element: CCAATTGTT Start: 545 Stop: 537 Pval: 0.00019474  
Element: TCTTTTGTT Start: 620 Stop: 628 Pval: 0.000378024  
Element: TCCTTTGTT Start: 139 Stop: 147 Pval: 0.000458211  
Element: CGTATTGTC Start: 638 Stop: 646 Pval: 0.000555581

Matched Sequence: YER081W 0.00208978 x  
Element: GCCATTGTT Start: 472 Stop: 480 Pval: 0.000183284  
Element: TCCATTGTG Start: 266 Stop: 258 Pval: 0.000441028  
Element: TACATTGTT Start: 495 Stop: 503 Pval: 0.000498305  
Element: AGTATTGTT Start: 102 Stop: 110 Pval: 0.000572764  
Element: AGCATTGTT Start: 300 Stop: 292 Pval: 0.000647223

Matched Sequence: YKL008C 0.00594222 x  
Element: TCTATTGTT Start: 705 Stop: 713 Pval: 3.43658e-05  
Element: TTTATTGTT Start: 789 Stop: 797 Pval: 0.000143191  
Element: GCTATTGTT Start: 933 Stop: 941 Pval: 0.000160374  
Element: CGTTTTGTT Start: 737 Stop: 745 Pval: 0.000567036

Matched Sequence: YNL036W 0.00644785 NCE3  
Element: GGTATTGTT Start: 488 Stop: 480 Pval: 0.000206195  
Element: TTGATTGTT Start: 250 Stop: 258 Pval: 0.00050976  
Element: GCAATTGTT Start: 170 Stop: 178 Pval: 0.000561309  
Element: CGCATTGTC Start: 756 Stop: 764 Pval: 0.000578492

Matched Sequence: YOL151W 0.00644785 GRE2  
Element: CCAATTGTT Start: 705 Stop: 697 Pval: 0.00019474  
Element: TCTTTTGTT Start: 27 Stop: 35 Pval: 0.000378024  
Element: TACATTGTT Start: 583 Stop: 591 Pval: 0.000498305  
Element: TGTATTGTC Start: 53 Stop: 45 Pval: 0.000578492

Matrix: ZAP1 Accessions (YJL056C)

Binomial p-value: 0.443056

Matched Sequence: YJR109C 0 CPA2  
Element: ACCCTAAATGT Start: 492 Stop: 482 Pval: 0

Matched Sequence: YOL154W 1.15444e-08 x  
Element: ACCCTGAAGGT Start: 682 Stop: 672 Pval: 0  
Element: ACCCTGAAGGT Start: 687 Stop: 697 Pval: 0

|                           |             |           |                   |
|---------------------------|-------------|-----------|-------------------|
| Element: ACCTTCAGGGT      | Start: 697  | Stop: 687 | Pval: 2.86961e-05 |
| Element: ACCTTCAGGGT      | Start: 672  | Stop: 682 | Pval: 3.44353e-05 |
| Matched Sequence: YLR130C | 1.2868e-05  | ZRT2      |                   |
| Element: ACCCTAAAGGT      | Start: 690  | Stop: 700 | Pval: 0           |
| Element: ACCCTAAAGGT      | Start: 749  | Stop: 739 | Pval: 0           |
| Element: TCCCAAAGGT       | Start: 837  | Stop: 827 | Pval: 3.44353e-05 |
| Element: ACCCTAACTGT      | Start: 60   | Stop: 70  | Pval: 9.75666e-05 |
| Element: ACCTTTAGGGT      | Start: 700  | Stop: 690 | Pval: 0.000103306 |
| Element: ACCTTTAGGGT      | Start: 739  | Stop: 749 | Pval: 0.000103306 |
| Element: ACCCTGTTGGT      | Start: 889  | Stop: 899 | Pval: 0.000522268 |
| Matched Sequence: YLR109W | 1.91377e-05 | x         |                   |
| Element: ACCTTAAAGGC      | Start: 451  | Stop: 441 | Pval: 1.72176e-05 |
| Element: GCCTTTAAGGT      | Start: 441  | Stop: 451 | Pval: 0.000103306 |
| Element: TCCGTTAAGGT      | Start: 648  | Stop: 658 | Pval: 0.000212351 |
| Element: ACCTTAACGGA      | Start: 658  | Stop: 648 | Pval: 0.000464876 |
| Element: ACCATGAAGTT      | Start: 274  | Stop: 264 | Pval: 0.000470615 |
| Element: ACCCCCAGCT       | Start: 293  | Stop: 283 | Pval: 0.000591139 |
| Element: AACTTCATGGT      | Start: 264  | Stop: 274 | Pval: 0.000665748 |
| Element: GCCAAAAGGT       | Start: 705  | Stop: 715 | Pval: 0.00072314  |
| Matched Sequence: YGL255W | 0.000214747 | ZRT1      |                   |
| Element: ACCCAAAGGT       | Start: 555  | Stop: 545 | Pval: 0           |
| Element: ACCCTCAAGGT      | Start: 682  | Stop: 692 | Pval: 0           |
| Element: ACCTTGAAGGT      | Start: 797  | Stop: 807 | Pval: 0           |
| Element: ACCTTCAAGGT      | Start: 807  | Stop: 797 | Pval: 0           |
| Element: ACCTTGAGGGT      | Start: 692  | Stop: 682 | Pval: 0.000206612 |
| Element: TCCTTCGAGGT      | Start: 673  | Stop: 663 | Pval: 0.000591139 |
| Matched Sequence: YJL056C | 0.00122286  | ZAP1      |                   |
| Element: ACCCTAAAGGT      | Start: 857  | Stop: 867 | Pval: 0           |
| Element: ACCTTTAGGGT      | Start: 867  | Stop: 857 | Pval: 0.000103306 |
| Matched Sequence: YPL250C | 0.00131773  | x         |                   |
| Element: CCCCCAAGCT       | Start: 93   | Stop: 103 | Pval: 0.000464876 |
| Element: ACCCGGAAGGG      | Start: 255  | Stop: 245 | Pval: 0.000464876 |
| Element: ACCCAAGGGA       | Start: 487  | Stop: 477 | Pval: 0.000464876 |
| Element: AGCCCCAAGGG      | Start: 525  | Stop: 535 | Pval: 0.000464876 |
| Element: AACCCAAGGG       | Start: 488  | Stop: 478 | Pval: 0.000591139 |
| Matched Sequence: YLR108C | 0.00355199  | x         |                   |
| Element: ACCTTAAAGGC      | Start: 894  | Stop: 904 | Pval: 1.72176e-05 |
| Element: GCCTTTAAGGT      | Start: 904  | Stop: 894 | Pval: 0.000103306 |
| Element: TCCGTTAAGGT      | Start: 697  | Stop: 687 | Pval: 0.000206612 |
| Element: ACCTTAACGGA      | Start: 687  | Stop: 697 | Pval: 0.000464876 |
| Element: GCCAAAAGGT       | Start: 640  | Stop: 630 | Pval: 0.00072314  |
| Matched Sequence: YOL064C | 0.00419652  | MET22     |                   |
| Element: ACCCCAAGAT       | Start: 132  | Stop: 122 | Pval: 2.86961e-05 |
| Element: GCCCTCAAGGA      | Start: 745  | Stop: 735 | Pval: 0.000183655 |
| Element: ACCTTATACGT      | Start: 711  | Stop: 721 | Pval: 0.000464876 |
| Element: ACCCTGAAAT       | Start: 25   | Stop: 35  | Pval: 0.000522268 |
| Matched Sequence: YPR065W | 0.00488444  | ROX1      |                   |
| Element: ACCGTAAATGT      | Start: 915  | Stop: 905 | Pval: 5.16529e-05 |

|                           |            |           |                   |  |
|---------------------------|------------|-----------|-------------------|--|
| Matched Sequence: YPR167C | 0.00488444 | MET16     |                   |  |
| Element: ACCGTAAAGAT      | Start: 769 | Stop: 759 | Pval: 5.16529e-05 |  |
| Matched Sequence: YHL047C | 0.00610963 | x         |                   |  |
| Element: ATTCTAAAGGT      | Start: 393 | Stop: 403 | Pval: 7.46097e-05 |  |
| Element: ACGCTCAAAGT      | Start: 609 | Stop: 599 | Pval: 0.000183655 |  |
| Matched Sequence: YHR071W | 0.00610963 | PCL5      |                   |  |
| Element: AACTAAAGGC       | Start: 130 | Stop: 140 | Pval: 9.75666e-05 |  |
| Element: GCGCTCAAGGT      | Start: 258 | Stop: 268 | Pval: 0.000183655 |  |
| Matched Sequence: YKL001C | 0.00841359 | MET14     |                   |  |
| Element: ACCTCAATGGT      | Start: 46  | Stop: 56  | Pval: 0.000132002 |  |
| Element: ACCATTGAGGT      | Start: 56  | Stop: 46  | Pval: 0.000206612 |  |

Matrix: AP-1 binding site      Accessions (YML007W)

Binomial p-value: 1.26829e-25

|                           |             |           |                   |  |
|---------------------------|-------------|-----------|-------------------|--|
| Matched Sequence: YDL182W | 1.01807e-06 | LYS20     |                   |  |
| Element: ATTAGTCAT        | Start: 320  | Stop: 312 | Pval: 0.000103098 |  |
| Element: ATTACTCAT        | Start: 644  | Stop: 636 | Pval: 0.000108825 |  |
| Element: ATGAGTAAT        | Start: 636  | Stop: 644 | Pval: 0.000137463 |  |
| Element: ATGACTAAT        | Start: 312  | Stop: 320 | Pval: 0.000183284 |  |
| Element: ATTACTCAC        | Start: 811  | Stop: 803 | Pval: 0.000183284 |  |
| Element: ATGAGCCAG        | Start: 380  | Stop: 372 | Pval: 0.000211923 |  |
| Element: GTGAGTAAT        | Start: 803  | Stop: 811 | Pval: 0.00021765  |  |
| Element: ATGAATAAG        | Start: 684  | Stop: 676 | Pval: 0.000229106 |  |
| Element: ATCAGTCAT        | Start: 408  | Stop: 400 | Pval: 0.00050976  |  |
| Element: ATGACTGAT        | Start: 400  | Stop: 408 | Pval: 0.000807597 |  |
| Matched Sequence: YMR096W | 3.77544e-06 | SNZ1      |                   |  |
| Element: CTGAGTCAG        | Start: 703  | Stop: 695 | Pval: 5.72764e-06 |  |
| Element: ATGACTCAG        | Start: 746  | Stop: 754 | Pval: 5.72764e-06 |  |
| Element: CTGACTCAG        | Start: 695  | Stop: 703 | Pval: 1.14553e-05 |  |
| Element: CTGAGTCAT        | Start: 754  | Stop: 746 | Pval: 2.86382e-05 |  |
| Element: GTGTGTCAG        | Start: 835  | Stop: 827 | Pval: 0.000114553 |  |
| Element: ATGACTCTG        | Start: 821  | Stop: 829 | Pval: 0.000309293 |  |
| Matched Sequence: YFR055W | 6.18789e-06 | x         |                   |  |
| Element: GTGACTCAG        | Start: 394  | Stop: 402 | Pval: 5.72764e-06 |  |
| Element: CTGAGTCAC        | Start: 402  | Stop: 394 | Pval: 6.3004e-05  |  |
| Element: ATGGGTCAG        | Start: 233  | Stop: 241 | Pval: 0.000171829 |  |
| Element: ATTACTCAC        | Start: 337  | Stop: 345 | Pval: 0.000183284 |  |
| Element: GTGAGTAAT        | Start: 345  | Stop: 337 | Pval: 0.00021765  |  |
| Matched Sequence: YJR109C | 6.25103e-06 | CPA2      |                   |  |
| Element: ATGAGTCAT        | Start: 662  | Stop: 654 | Pval: 1.14553e-05 |  |
| Element: ATGACTCAT        | Start: 654  | Stop: 662 | Pval: 1.71829e-05 |  |
| Element: GTGACTCAA        | Start: 219  | Stop: 227 | Pval: 8.59146e-05 |  |
| Element: TTGAGTCAC        | Start: 227  | Stop: 219 | Pval: 0.000108825 |  |
| Element: TTGAGTAAG        | Start: 785  | Stop: 793 | Pval: 0.000166102 |  |
| Element: ATTAGTAAG        | Start: 474  | Stop: 466 | Pval: 0.000252016 |  |
| Element: CTTACTCAA        | Start: 793  | Stop: 785 | Pval: 0.000624313 |  |
| Element: AAGAGTCAT        | Start: 715  | Stop: 707 | Pval: 0.0007045   |  |
| Element: ATTAGTAAT        | Start: 869  | Stop: 861 | Pval: 0.000916422 |  |
| Element: ATGACTCTT        | Start: 707  | Stop: 715 | Pval: 0.000979426 |  |

|                           |             |           |                   |
|---------------------------|-------------|-----------|-------------------|
| Matched Sequence: YOL058W | 6.96022e-06 | ARG1      |                   |
| Element: ATGAGTCAC        | Start: 664  | Stop: 656 | Pval: 2.29106e-05 |
| Element: GTGACTCAT        | Start: 656  | Stop: 664 | Pval: 3.43658e-05 |
| Element: ATTACTCAT        | Start: 754  | Stop: 762 | Pval: 0.000108825 |
| Element: ATGAGTAAT        | Start: 762  | Stop: 754 | Pval: 0.000137463 |
| Element: GTTAGTCAC        | Start: 611  | Stop: 619 | Pval: 0.000211923 |
| Element: GTAAGTCAG        | Start: 28   | Stop: 36  | Pval: 0.000246288 |
| Element: GTGACTAAC        | Start: 619  | Stop: 611 | Pval: 0.000624313 |
| Element: AAGAGTCAT        | Start: 726  | Stop: 734 | Pval: 0.000693044 |
| Element: TTGAGACAG        | Start: 844  | Stop: 836 | Pval: 0.000864874 |
| Element: ATGACTCTT        | Start: 734  | Stop: 726 | Pval: 0.000990882 |
| <br>                      |             |           |                   |
| Matched Sequence: YDL198C | 9.98009e-06 | YHM1      |                   |
| Element: GTGAGTCAC        | Start: 844  | Stop: 852 | Pval: 3.43658e-05 |
| Element: GTGACTCAC        | Start: 852  | Stop: 844 | Pval: 8.0187e-05  |
| Element: ATTACTCAT        | Start: 376  | Stop: 384 | Pval: 0.000108825 |
| Element: ATGAGTAAT        | Start: 384  | Stop: 376 | Pval: 0.000137463 |
| <br>                      |             |           |                   |
| Matched Sequence: YER175C | 1.59088e-05 | x         |                   |
| Element: GTGAGTCAT        | Start: 838  | Stop: 830 | Pval: 1.71829e-05 |
| Element: ATGACTCAC        | Start: 830  | Stop: 838 | Pval: 3.43658e-05 |
| Element: ATGAATCAC        | Start: 802  | Stop: 810 | Pval: 0.000114553 |
| Element: TTGAGTAAG        | Start: 52   | Stop: 60  | Pval: 0.000166102 |
| Element: GTGATTCAT        | Start: 810  | Stop: 802 | Pval: 0.000463939 |
| Element: CTTACTCAA        | Start: 60   | Stop: 52  | Pval: 0.000624313 |
| Element: TTTAGTCAA        | Start: 687  | Stop: 679 | Pval: 0.000761776 |
| Element: TTGAGGCAG        | Start: 603  | Stop: 595 | Pval: 0.000864874 |
| Element: GTAAGTCAT        | Start: 418  | Stop: 426 | Pval: 0.000887784 |
| <br>                      |             |           |                   |
| Matched Sequence: YPR167C | 2.92551e-05 | MET16     |                   |
| Element: ATGACTCAG        | Start: 852  | Stop: 860 | Pval: 5.72764e-06 |
| Element: CTGAGTCAT        | Start: 860  | Stop: 852 | Pval: 2.86382e-05 |
| <br>                      |             |           |                   |
| Matched Sequence: YER024W | 3.25343e-05 | x         |                   |
| Element: ATGAGTAAG        | Start: 932  | Stop: 940 | Pval: 5.15488e-05 |
| Element: ATGAATCAT        | Start: 846  | Stop: 854 | Pval: 8.59146e-05 |
| Element: TTGAGTCAA        | Start: 251  | Stop: 259 | Pval: 0.000114553 |
| Element: ATGAATCAA        | Start: 954  | Stop: 946 | Pval: 0.000148919 |
| Element: TTGACTCAA        | Start: 259  | Stop: 251 | Pval: 0.000160374 |
| Element: ATGATTCAT        | Start: 854  | Stop: 846 | Pval: 0.000263471 |
| Element: CTTACTCAT        | Start: 940  | Stop: 932 | Pval: 0.000274927 |
| Element: ATGTCTCAA        | Start: 62   | Stop: 54  | Pval: 0.000773231 |
| <br>                      |             |           |                   |
| Matched Sequence: YIL116W | 3.91473e-05 | HIS5      |                   |
| Element: GTGAGTCAA        | Start: 806  | Stop: 798 | Pval: 6.3004e-05  |
| Element: ATTAGTCAT        | Start: 674  | Stop: 666 | Pval: 0.000103098 |
| Element: TTGACTCAC        | Start: 798  | Stop: 806 | Pval: 0.000114553 |
| Element: ATGACTAAT        | Start: 666  | Stop: 674 | Pval: 0.000183284 |
| Element: TTTAGTCAT        | Start: 735  | Stop: 727 | Pval: 0.000349386 |
| Element: ATGACTAAA        | Start: 727  | Stop: 735 | Pval: 0.000446756 |
| <br>                      |             |           |                   |
| Matched Sequence: YLR152C | 5.01257e-05 | x         |                   |
| Element: GTGAGTCAT        | Start: 839  | Stop: 847 | Pval: 1.71829e-05 |
| Element: ATGACTCAC        | Start: 847  | Stop: 839 | Pval: 3.43658e-05 |
| <br>                      |             |           |                   |
| Matched Sequence: YMR095C | 0.0001281   | SNO1      |                   |

|                                              |            |           |                   |
|----------------------------------------------|------------|-----------|-------------------|
| Element: ATGACTCAG                           | Start: 807 | Stop: 799 | Pval: 5.72764e-06 |
| Element: CTGAGTCAG                           | Start: 850 | Stop: 858 | Pval: 5.72764e-06 |
| Element: CTGACTCAG                           | Start: 858 | Stop: 850 | Pval: 1.14553e-05 |
| Element: CTGAGTCAT                           | Start: 799 | Stop: 807 | Pval: 2.86382e-05 |
| Element: GTGTGTCAG                           | Start: 718 | Stop: 726 | Pval: 0.000114553 |
| Element: GTAAGTCAG                           | Start: 398 | Stop: 390 | Pval: 0.000246288 |
| Element: ATGACTCTG                           | Start: 732 | Stop: 724 | Pval: 0.000309293 |
| Element: ATGATTAAG                           | Start: 360 | Stop: 352 | Pval: 0.000927878 |
| Matched Sequence: YBR147W 0.000207304 x      |            |           |                   |
| Element: ATGACTCAA                           | Start: 778 | Stop: 786 | Pval: 4.00935e-05 |
| Element: TTGAGTCAT                           | Start: 786 | Stop: 778 | Pval: 7.44593e-05 |
| Element: ATTAGTAAG                           | Start: 51  | Stop: 43  | Pval: 0.000252016 |
| Element: TTGATTCAG                           | Start: 364 | Stop: 356 | Pval: 0.000378024 |
| Element: CTGAATCAA                           | Start: 356 | Stop: 364 | Pval: 0.00041239  |
| Element: ATGTGTCAA                           | Start: 587 | Stop: 579 | Pval: 0.00050976  |
| Element: AAGAGTCAT                           | Start: 860 | Stop: 868 | Pval: 0.000693044 |
| Element: ATGACTCTT                           | Start: 868 | Stop: 860 | Pval: 0.000990882 |
| Matched Sequence: YCL030C 0.000207304 HIS4   |            |           |                   |
| Element: GTGAGTCAC                           | Start: 809 | Stop: 801 | Pval: 3.43658e-05 |
| Element: GTGACTCAC                           | Start: 801 | Stop: 809 | Pval: 8.0187e-05  |
| Element: GTGACTCCG                           | Start: 757 | Stop: 765 | Pval: 0.000498305 |
| Element: ATCAGTCAT                           | Start: 818 | Stop: 826 | Pval: 0.00050976  |
| Element: ATGGGTCAT                           | Start: 676 | Stop: 684 | Pval: 0.000624313 |
| Element: ATGACTGAT                           | Start: 826 | Stop: 818 | Pval: 0.000807597 |
| Element: TAGAGTCAG                           | Start: 753 | Stop: 745 | Pval: 0.000864874 |
| Element: ATGACCCAT                           | Start: 684 | Stop: 676 | Pval: 0.000990882 |
| Matched Sequence: YDR158W 0.000330703 HOM2   |            |           |                   |
| Element: ATGAGTCAA                           | Start: 824 | Stop: 816 | Pval: 2.86382e-05 |
| Element: TTGACTCAT                           | Start: 816 | Stop: 824 | Pval: 9.73699e-05 |
| Element: ATGAGTGAG                           | Start: 575 | Stop: 583 | Pval: 0.000160374 |
| Matched Sequence: YGL059W 0.000381144 x      |            |           |                   |
| Element: ATGACTCAA                           | Start: 855 | Stop: 847 | Pval: 4.58211e-05 |
| Element: TTGAGTCAT                           | Start: 847 | Stop: 855 | Pval: 6.87317e-05 |
| Matched Sequence: YJR025C 0.000595104 BNA1   |            |           |                   |
| Element: GTGAGTCAC                           | Start: 878 | Stop: 886 | Pval: 3.43658e-05 |
| Element: GTGACTCAC                           | Start: 886 | Stop: 878 | Pval: 8.0187e-05  |
| Matched Sequence: YMR058W 0.000704062 FET3   |            |           |                   |
| Element: CTAAGTCAG                           | Start: 716 | Stop: 708 | Pval: 0.000389479 |
| Element: CTGAGTCTG                           | Start: 397 | Stop: 405 | Pval: 0.000475394 |
| Element: GCGACTCAG                           | Start: 674 | Stop: 666 | Pval: 0.000504032 |
| Element: ATGTCTCAC                           | Start: 423 | Stop: 415 | Pval: 0.000567036 |
| Element: CTGACTTAG                           | Start: 708 | Stop: 716 | Pval: 0.000567036 |
| Element: CAGACTCAG                           | Start: 405 | Stop: 397 | Pval: 0.000721683 |
| Matched Sequence: YER069W 0.000907486 ARG5,6 |            |           |                   |
| Element: ATGACTCAG                           | Start: 777 | Stop: 785 | Pval: 5.72764e-06 |
| Element: CTGAGTCAT                           | Start: 785 | Stop: 777 | Pval: 2.86382e-05 |
| Element: ATTAGTCAT                           | Start: 654 | Stop: 646 | Pval: 0.000103098 |
| Element: ATGACTAAT                           | Start: 646 | Stop: 654 | Pval: 0.000183284 |
| Element: AAGAGTCAT                           | Start: 831 | Stop: 823 | Pval: 0.0007045   |
| Element: ATGAATAAT                           | Start: 571 | Stop: 579 | Pval: 0.000830508 |

|                           |             |           |                   |
|---------------------------|-------------|-----------|-------------------|
| Element: ATGACTCTT        | Start: 823  | Stop: 831 | Pval: 0.000979426 |
| Matched Sequence: YGR065C | 0.000907486 | x         |                   |
| Element: ATGAATCAC        | Start: 733  | Stop: 741 | Pval: 0.000114553 |
| Element: ATTACTCAA        | Start: 356  | Stop: 364 | Pval: 0.000240561 |
| Element: GTGATTCAT        | Start: 741  | Stop: 733 | Pval: 0.000463939 |
| Element: TTGAGTAAT        | Start: 364  | Stop: 356 | Pval: 0.000595675 |
| Element: AAGAGTCAT        | Start: 899  | Stop: 891 | Pval: 0.0007045   |
| Element: TTGCGTCAG        | Start: 661  | Stop: 669 | Pval: 0.000784687 |
| Element: ATGACTCTT        | Start: 891  | Stop: 899 | Pval: 0.000979426 |
| Matched Sequence: YPL250C | 0.000907486 | x         |                   |
| Element: ATTACTCAT        | Start: 742  | Stop: 750 | Pval: 0.000108825 |
| Element: ATGAGTAAT        | Start: 750  | Stop: 742 | Pval: 0.000137463 |
| Element: ATGAGTGAG        | Start: 304  | Stop: 296 | Pval: 0.000160374 |
| Element: ATGTGTCAT        | Start: 713  | Stop: 705 | Pval: 0.000211923 |
| Element: ATGAGTCCT        | Start: 867  | Stop: 859 | Pval: 0.0007045   |
| Element: ATGACACAT        | Start: 705  | Stop: 713 | Pval: 0.000979426 |
| Element: AGGACTCAT        | Start: 859  | Stop: 867 | Pval: 0.000979426 |
| Matched Sequence: YPR145W | 0.00103888  | ASN1      |                   |
| Element: ATGAGTCAA        | Start: 781  | Stop: 773 | Pval: 2.86382e-05 |
| Element: TTGACTCAT        | Start: 773  | Stop: 781 | Pval: 9.73699e-05 |
| Matched Sequence: YNL036W | 0.00123439  | NCE3      |                   |
| Element: CTGAATCAG        | Start: 51   | Stop: 59  | Pval: 8.0187e-05  |
| Element: ATTACTCAT        | Start: 831  | Stop: 823 | Pval: 0.000108825 |
| Element: ATGAGTAAT        | Start: 823  | Stop: 831 | Pval: 0.000137463 |
| Element: CTGATTCAG        | Start: 59   | Stop: 51  | Pval: 0.000183284 |
| Element: GTGAATCAC        | Start: 592  | Stop: 584 | Pval: 0.000211923 |
| Element: GTGATTCAC        | Start: 584  | Stop: 592 | Pval: 0.000796142 |
| Matched Sequence: YER081W | 0.00139243  | x         |                   |
| Element: ATTACTCAT        | Start: 842  | Stop: 834 | Pval: 0.000108825 |
| Element: ATGAGTAAT        | Start: 834  | Stop: 842 | Pval: 0.000137463 |
| Element: GTGAGTAAA        | Start: 519  | Stop: 511 | Pval: 0.000526943 |
| Element: GTGAGTAAA        | Start: 655  | Stop: 647 | Pval: 0.000526943 |
| Element: TTTACTCAC        | Start: 511  | Stop: 519 | Pval: 0.000813325 |
| Element: TTTACTCAC        | Start: 647  | Stop: 655 | Pval: 0.000813325 |
| Matched Sequence: YKR069W | 0.00159451  | MET1      |                   |
| Element: GTGAATCAT        | Start: 814  | Stop: 822 | Pval: 0.000114553 |
| Element: ATGAGTCCG        | Start: 793  | Stop: 785 | Pval: 0.000211923 |
| Element: TTGAATCAT        | Start: 688  | Stop: 696 | Pval: 0.000320748 |
| Element: ATGATTCAC        | Start: 822  | Stop: 814 | Pval: 0.000463939 |
| Element: ATGATTCAA        | Start: 696  | Stop: 688 | Pval: 0.000612857 |
| Matched Sequence: YLR460C | 0.00167013  | x         |                   |
| Element: CTTAGTCAG        | Start: 691  | Stop: 683 | Pval: 8.0187e-05  |
| Element: CTGACTAAG        | Start: 683  | Stop: 691 | Pval: 0.000137463 |
| Element: ATTACTAAG        | Start: 833  | Stop: 841 | Pval: 0.000400935 |
| Element: TTGTCTCAG        | Start: 674  | Stop: 682 | Pval: 0.000418118 |
| Element: CTGAATAAG        | Start: 157  | Stop: 149 | Pval: 0.000618585 |
| Matched Sequence: YOL064C | 0.0019627   | MET22     |                   |
| Element: ATGACTCAG        | Start: 846  | Stop: 854 | Pval: 5.72764e-06 |
| Element: CTGAGTCAT        | Start: 854  | Stop: 846 | Pval: 2.86382e-05 |

|                           |            |           |                   |
|---------------------------|------------|-----------|-------------------|
| Element: ATTAATAAG        | Start: 446 | Stop: 454 | Pval: 0.000400935 |
| Element: GTTAGTAAG        | Start: 950 | Stop: 958 | Pval: 0.000463939 |
| Element: GTGTGTCAC        | Start: 387 | Stop: 395 | Pval: 0.000721683 |
| Element: TAGAGTCAG        | Start: 166 | Stop: 174 | Pval: 0.000864874 |
| Matched Sequence: YBR256C | 0.00218872 | RIB5      |                   |
| Element: ATTAGTCAT        | Start: 906 | Stop: 914 | Pval: 0.000103098 |
| Element: ATGACTAAT        | Start: 914 | Stop: 906 | Pval: 0.000189012 |
| Element: ATGAATAAG        | Start: 292 | Stop: 284 | Pval: 0.000229106 |
| Element: ATTTGTCAG        | Start: 228 | Stop: 220 | Pval: 0.000446756 |
| Matched Sequence: YDR533C | 0.00270865 | x         |                   |
| Element: ATTAGTCAG        | Start: 648 | Stop: 640 | Pval: 2.86382e-05 |
| Element: GTTACTCAT        | Start: 739 | Stop: 747 | Pval: 0.000183284 |
| Element: ATGAGTAAC        | Start: 747 | Stop: 739 | Pval: 0.00021765  |
| Element: CTGACTAAT        | Start: 640 | Stop: 648 | Pval: 0.000469666 |
| Matched Sequence: YNR050C | 0.00275605 | LYS9      |                   |
| Element: ATTAGTCAT        | Start: 751 | Stop: 759 | Pval: 0.000108825 |
| Element: ATGAGTAAT        | Start: 759 | Stop: 751 | Pval: 0.000137463 |
| Matched Sequence: YDL066W | 0.00386696 | IDP1      |                   |
| Element: GTGAGTCAA        | Start: 900 | Stop: 892 | Pval: 6.3004e-05  |
| Element: TTGACTCAC        | Start: 892 | Stop: 900 | Pval: 0.000114553 |
| Element: TTGAATCAT        | Start: 817 | Stop: 825 | Pval: 0.000320748 |
| Element: ATGATTCAA        | Start: 825 | Stop: 817 | Pval: 0.000612857 |
| Element: AAGAGTCAT        | Start: 527 | Stop: 519 | Pval: 0.0007045   |
| Element: ATGACTCTT        | Start: 519 | Stop: 527 | Pval: 0.000979426 |
| Matched Sequence: YIR034C | 0.00411506 | LYS1      |                   |
| Element: ATGAGTCAA        | Start: 750 | Stop: 758 | Pval: 2.86382e-05 |
| Element: TTGACTCAT        | Start: 758 | Stop: 750 | Pval: 9.73699e-05 |
| Element: ATGACTCTG        | Start: 430 | Stop: 438 | Pval: 0.000309293 |
| Element: GTGCCTCAG        | Start: 64  | Stop: 56  | Pval: 0.000463939 |
| Element: AAGAGTCAT        | Start: 865 | Stop: 873 | Pval: 0.000693044 |
| Element: ATGACTCTT        | Start: 873 | Stop: 865 | Pval: 0.000990882 |
| Matched Sequence: YLR303W | 0.00412135 | MET17     |                   |
| Element: ATTAGTCAT        | Start: 751 | Stop: 743 | Pval: 0.000103098 |
| Element: ATGACTAAT        | Start: 743 | Stop: 751 | Pval: 0.000183284 |
| Element: GTTAGTCAA        | Start: 755 | Stop: 763 | Pval: 0.000320748 |
| Matched Sequence: YDR353W | 0.00560117 | TRR1      |                   |
| Element: ATGACTAAG        | Start: 816 | Stop: 808 | Pval: 8.59146e-05 |
| Element: CTTAGTCAT        | Start: 808 | Stop: 816 | Pval: 0.000177557 |
| Matched Sequence: YBR145W | 0.00605618 | ADH5      |                   |
| Element: ATGAGTCAA        | Start: 773 | Stop: 781 | Pval: 2.86382e-05 |
| Element: TTGACTCAT        | Start: 781 | Stop: 773 | Pval: 9.73699e-05 |
| Element: GTGAGACAG        | Start: 935 | Stop: 927 | Pval: 0.000383752 |
| Element: ATCAGTCAT        | Start: 632 | Stop: 624 | Pval: 0.00050976  |
| Element: ATGACTGAT        | Start: 624 | Stop: 632 | Pval: 0.000807597 |
| Matched Sequence: YOL154W | 0.00610964 | x         |                   |
| Element: CTGAATCAG        | Start: 601 | Stop: 609 | Pval: 8.0187e-05  |
| Element: CTGATTCAG        | Start: 609 | Stop: 601 | Pval: 0.000183284 |

|                               |                |           |                   |  |
|-------------------------------|----------------|-----------|-------------------|--|
| Matched Sequence: YBR047W     | 0.00712194     | x         |                   |  |
| Element: ATTACTCAT            | Start: 859     | Stop: 867 | Pval: 0.000108825 |  |
| Element: ATGAGTAAT            | Start: 867     | Stop: 859 | Pval: 0.000137463 |  |
| Element: ATTATTCAG            | Start: 939     | Stop: 931 | Pval: 0.000486849 |  |
| Element: TTGAGTTAG            | Start: 388     | Stop: 396 | Pval: 0.00072741  |  |
| Element: ATGAATAAT            | Start: 923     | Stop: 915 | Pval: 0.000836235 |  |
| <br>Matched Sequence: YHR018C | <br>0.00712194 | <br>ARG4  |                   |  |
| Element: GTGAGTCAT            | Start: 829     | Stop: 821 | Pval: 1.71829e-05 |  |
| Element: ATGACTCAC            | Start: 821     | Stop: 829 | Pval: 3.43658e-05 |  |
| Element: GTTACTCAT            | Start: 778     | Stop: 786 | Pval: 0.000183284 |  |
| Element: ATGAGTAAC            | Start: 786     | Stop: 778 | Pval: 0.00021765  |  |
| Element: ATGAATAAT            | Start: 602     | Stop: 594 | Pval: 0.000836235 |  |
| <br>Matched Sequence: YGL255W | <br>0.00712194 | <br>ZRT1  |                   |  |
| Element: ATTAGTCAA            | Start: 503     | Stop: 511 | Pval: 0.000160374 |  |
| Element: ATGAGACAG            | Start: 775     | Stop: 783 | Pval: 0.000200467 |  |
| Element: ATGACTTAG            | Start: 882     | Stop: 890 | Pval: 0.00021765  |  |
| Element: CTGTCTCAT            | Start: 783     | Stop: 775 | Pval: 0.000796142 |  |
| Element: TTGACTAAT            | Start: 511     | Stop: 503 | Pval: 0.000836235 |  |
| <br>Matched Sequence: YKL218C | <br>0.00883307 | <br>x     |                   |  |
| Element: ATTAGTCAT            | Start: 810     | Stop: 802 | Pval: 0.000103098 |  |
| Element: ATGAATCAA            | Start: 164     | Stop: 156 | Pval: 0.000148919 |  |
| Element: ATGACTAAT            | Start: 802     | Stop: 810 | Pval: 0.000183284 |  |
| Element: ATGAGGCAT            | Start: 468     | Stop: 460 | Pval: 0.0007045   |  |
| Element: ATGCCTCAT            | Start: 460     | Stop: 468 | Pval: 0.000876329 |  |
| <br>Matched Sequence: YJR010W | <br>0.00977642 | <br>MET3  |                   |  |
| Element: CTGAGTAAG            | Start: 283     | Stop: 291 | Pval: 0.000108825 |  |
| Element: CTTACTCAG            | Start: 291     | Stop: 283 | Pval: 0.000108825 |  |
| Element: GTGTGTCAT            | Start: 576     | Stop: 568 | Pval: 0.00041239  |  |
