# Supplementary material
Source: PubMed Central journal article supplement (PMC373293)
Supplement: nar_32_1_179__15.pdf [file nar_32_1_179__15.pdf]

ROVER Output:

Sequence Pvalue Cutoff: 0.01

Site Pvalue Cutoff: 0.001

| Matrix | Pvalue      |                   |
|--------|-------------|-------------------|
| M00199 | 1.26829e-25 | AP1               |
| M00038 | 5.29094e-14 | GCN4              |
| M00064 | 8.88588e-07 | PHO4              |
| M00713 | 1.3027e-05  | TBP               |
| M00303 | 2.6207e-05  | CBF1              |
| M00204 | 0.000123411 | GCN4              |
| M00305 | 0.00834084  | HAP1              |
| M00753 | 0.0116402   | RCS1              |
| M00683 | 0.01935     | XBP1              |
| M00197 | 0.0200759   | ABF1              |
| M00274 | 0.0238664   | STE11             |
| M00703 | 0.0814064   | TAF               |
| M00015 | 0.169805    | ABF1              |
| M00275 | 0.222364    | MAT1-Mc           |
| M00168 | 0.23117     | HSF               |
| M00031 | 0.233087    | MATalpha2         |
| M00198 | 0.254144    | GAL4              |
| M00170 | 0.255974    | HSF               |
| M00337 | 0.332231    | GCR1              |
| M00061 | 0.333144    | MIG1              |
| M00169 | 0.334044    | HSF               |
| M00167 | 0.359943    | HSF               |
| M00030 | 0.362258    | MATalpha1         |
| M00049 | 0.389903    | GAL4              |
| M00754 | 0.443056    | ZAP1              |
| M00029 | 0.473304    | HSF               |
| M00732 | 0.510594    | CAT8              |
| M00752 | 0.512255    | PDR3              |
| M00014 | 0.629708    | repressor of CAR1 |
| M00728 | 0.629708    | ROX1              |
| M00306 | 0.63119     | LEU3              |
| M00046 | 0.640822    | GCR1              |
| M00276 | 0.658319    | Mat1-Mc           |
| M00307 | 0.658319    | REB1              |
| M00125 | 0.686103    | MCM1              |
| M00207 | 0.68763     | LAC9              |
| M00730 | 0.787829    | HAC1              |
| M00288 | 0.829612    | HAP2/3/5          |
| M00048 | 0.898749    | ADR1              |
| M00664 | 0.946328    | STE12             |
| M00308 | 0.953026    | STRE              |
| M00213 | 0.960727    | RAP1              |
| M00759 | 0.99677     | MCM1+SF           |
