# Supplementary material
Source: PubMed Central journal article supplement (PMC373293)
Supplement: nar_32_1_179__17.pdf [file nar_32_1_179__17.pdf]

ROVER Output:  
Sequence Pvalue Cutoff: 0.01  
Site Pvalue Cutoff: 0.001

Matrix: ZAP1 Accessions(YJL056C)

Binomial p-value: 2.10596e-06

Matched Sequence: YOL154W 2.06594e-10 x  
Element: ACCCTGAAGGT Start: 682 Stop: 672 Pval: 5.10152e-06  
Element: ACCCTGAAGGT Start: 687 Stop: 697 Pval: 5.10152e-06  
Element: ACCTTCAGGGT Start: 672 Stop: 682 Pval: 1.53046e-05  
Element: ACCTTCAGGGT Start: 697 Stop: 687 Pval: 1.53046e-05

Matched Sequence: YLR130C 4.01027e-06 ZRT2  
Element: ACCCTAAAGGT Start: 690 Stop: 700 Pval: 5.10152e-06  
Element: ACCCTAAAGGT Start: 749 Stop: 739 Pval: 5.10152e-06  
Element: TCCCAAAGGT Start: 837 Stop: 827 Pval: 1.53046e-05  
Element: ACCCTAACTGT Start: 60 Stop: 70 Pval: 7.65228e-05  
Element: ACCTTTAGGGT Start: 700 Stop: 690 Pval: 8.67258e-05  
Element: ACCTTTAGGGT Start: 739 Stop: 749 Pval: 9.18274e-05  
Element: ACCCTGTTGGT Start: 889 Stop: 899 Pval: 0.000443832

Matched Sequence: YGL255W 6.38665e-05 ZRT1  
Element: ACCCAAAGGT Start: 555 Stop: 545 Pval: 5.10152e-06  
Element: ACCCTCAAGGT Start: 682 Stop: 692 Pval: 5.10152e-06  
Element: ACCTTCAAGGT Start: 807 Stop: 797 Pval: 5.10152e-06  
Element: ACCTTGAAGGT Start: 797 Stop: 807 Pval: 1.0203e-05  
Element: ACCTTGAGGGT Start: 692 Stop: 682 Pval: 0.000147944  
Element: TCCTTCGAGGT Start: 673 Stop: 663 Pval: 0.000520355  
Element: ACGGTAACGGT Start: 566 Stop: 556 Pval: 0.000821345  
Element: ACCTCGAAGGA Start: 663 Stop: 673 Pval: 0.000846852

Matched Sequence: YGL121C 6.38665e-05 x  
Element: ACCGTAAAGGT Start: 793 Stop: 803 Pval: 5.10152e-06  
Element: AACCTAAAGCT Start: 618 Stop: 628 Pval: 7.65228e-05  
Element: ACCTTTACGGT Start: 803 Stop: 793 Pval: 8.67258e-05  
Element: ACCCAAAGGT Start: 910 Stop: 900 Pval: 0.000387716  
Element: CCCTTCGAGGT Start: 714 Stop: 724 Pval: 0.000566269  
Element: TCCAAAAGGT Start: 412 Stop: 422 Pval: 0.000607081  
Element: ACACAAATGT Start: 535 Stop: 525 Pval: 0.000642792  
Element: ACCTCGAAGGG Start: 724 Stop: 714 Pval: 0.000846852

Matched Sequence: YGL256W 0.000165803 ADH4  
Element: ACCTTCACGGT Start: 732 Stop: 742 Pval: 1.53046e-05  
Element: ACCGTGAAGGT Start: 742 Stop: 732 Pval: 1.53046e-05  
Element: ACCCTAAAGT Start: 365 Stop: 375 Pval: 9.18274e-05  
Element: ACTTGAAAGGT Start: 684 Stop: 694 Pval: 0.000255076  
Element: ACTATGAAGGT Start: 109 Stop: 99 Pval: 0.000408122  
Element: ACCTTCATAGT Start: 99 Stop: 109 Pval: 0.000566269

Matched Sequence: YBR066C 0.000201234 x  
Element: ACCCTCAAGTT Start: 81 Stop: 91 Pval: 1.0203e-05

Matched Sequence: YJL132W 0.000301405 x  
Element: ACCCAAAGGGT Start: 847 Stop: 857 Pval: 3.06091e-05  
Element: AGTCTAAAGGT Start: 429 Stop: 419 Pval: 4.59137e-05  
Element: ACCCTTTGGGT Start: 857 Stop: 847 Pval: 0.000209162  
Element: ATCCCAAAGCT Start: 769 Stop: 779 Pval: 0.000387716

|                           |             |           |                   |
|---------------------------|-------------|-----------|-------------------|
| Element: AATCTGAAGGT      | Start: 229  | Stop: 239 | Pval: 0.000443832 |
| Matched Sequence: YGL258W | 0.0003513   | x         |                   |
| Element: ACCCGCAGGGT      | Start: 779  | Stop: 769 | Pval: 0.000107132 |
| Element: ATCATTAAGGT      | Start: 873  | Stop: 883 | Pval: 0.000147944 |
| Element: ACCTTAATGAT      | Start: 883  | Stop: 873 | Pval: 0.000387716 |
| Element: ACCCTGCGGGT      | Start: 769  | Stop: 779 | Pval: 0.000443832 |
| Element: AACTTCAAAGT      | Start: 207  | Stop: 197 | Pval: 0.000520355 |
| Element: ACCACTCAGGT      | Start: 602  | Stop: 592 | Pval: 0.000846852 |
| Element: ACCGCTGAGGT      | Start: 802  | Stop: 812 | Pval: 0.000846852 |
| Matched Sequence: YJL056C | 0.000741352 | ZAP1      |                   |
| Element: ACCCTAAAGGT      | Start: 857  | Stop: 867 | Pval: 5.10152e-06 |
| Element: ACCTTTAGGGT      | Start: 867  | Stop: 857 | Pval: 8.67258e-05 |
| Matched Sequence: YDR284C | 0.000873452 | DPP1      |                   |
| Element: ACCTGAAAGGT      | Start: 559  | Stop: 549 | Pval: 1.0203e-05  |
| Element: ACCTTTCAGGT      | Start: 549  | Stop: 559 | Pval: 9.18274e-05 |
| Matched Sequence: YDR055W | 0.00106097  | x         |                   |
| Element: TCCCTCAAGGA      | Start: 606  | Stop: 596 | Pval: 0.000122436 |
| Element: CCGCTCAAGGT      | Start: 818  | Stop: 828 | Pval: 0.000122436 |
| Element: ACCACAAAGCT      | Start: 632  | Stop: 642 | Pval: 0.000255076 |
| Element: ACCCCAAGGGA      | Start: 115  | Stop: 125 | Pval: 0.000387716 |
| Element: AACCCCAAGGG      | Start: 114  | Stop: 124 | Pval: 0.000566269 |
| Matched Sequence: YKL175W | 0.00117484  | x         |                   |
| Element: ACCCTTAAGGT      | Start: 856  | Stop: 846 | Pval: 5.10152e-06 |
| Element: ACCTTAAGGGT      | Start: 846  | Stop: 856 | Pval: 1.53046e-05 |
| Element: AACCTTAAGGG      | Start: 845  | Stop: 855 | Pval: 0.000214264 |
| Element: ACCCCATTGGT      | Start: 283  | Stop: 273 | Pval: 0.000387716 |
| Matched Sequence: YLL020C | 0.00117484  | x         |                   |
| Element: ACCCTCAAGGT      | Start: 68   | Stop: 78  | Pval: 5.10152e-06 |
| Element: ATCTCAAAGGT      | Start: 862  | Stop: 872 | Pval: 0.000112233 |
| Element: ACCTTGAGGGT      | Start: 78   | Stop: 68  | Pval: 0.000147944 |
| Element: AGCTTAAAGTT      | Start: 766  | Stop: 756 | Pval: 0.000387716 |
| Matched Sequence: YOR387C | 0.00172637  | x         |                   |
| Element: ACCCGCAGGGT      | Start: 780  | Stop: 770 | Pval: 0.000107132 |
| Element: ATCATTAAGGT      | Start: 873  | Stop: 883 | Pval: 0.000147944 |
| Element: ACCTTAATGAT      | Start: 883  | Stop: 873 | Pval: 0.000387716 |
| Element: ACCCTGCGGGT      | Start: 770  | Stop: 780 | Pval: 0.000443832 |
| Element: ACCACTCAGGT      | Start: 603  | Stop: 593 | Pval: 0.000846852 |
| Element: ACCGCTGAGGT      | Start: 802  | Stop: 812 | Pval: 0.000846852 |
| Matched Sequence: YFL014W | 0.00181213  | HSP12     |                   |
| Element: ACCTCAAAGTT      | Start: 800  | Stop: 790 | Pval: 0.000107132 |
| Element: AACCTCAAAGT      | Start: 801  | Stop: 791 | Pval: 0.000122436 |
| Element: ATCTGAAAGGT      | Start: 820  | Stop: 830 | Pval: 0.000255076 |
| Matched Sequence: YMR120C | 0.0019795   | ADE17     |                   |
| Element: AACTTAAAGGT      | Start: 913  | Stop: 903 | Pval: 1.0203e-05  |
| Element: ACTCTCAAGTT      | Start: 276  | Stop: 266 | Pval: 0.000122436 |
| Matched Sequence: YEL040W | 0.00336444  | UTR2      |                   |
| Element: ATCTTCAAGGT      | Start: 832  | Stop: 842 | Pval: 1.53046e-05 |

|                           |            |           |                   |
|---------------------------|------------|-----------|-------------------|
| Element: ACCTTGAAGAT      | Start: 842 | Stop: 832 | Pval: 0.000147944 |
| Matched Sequence: YBR285W | 0.0038884  | x         |                   |
| Element: ACCCTAAAGAA      | Start: 526 | Stop: 536 | Pval: 4.59137e-05 |
| Matched Sequence: YMR118C | 0.00649087 | x         |                   |
| Element: ACCCTTAAGAT      | Start: 245 | Stop: 255 | Pval: 1.0203e-05  |
| Element: AACTCAAGAT       | Start: 234 | Stop: 244 | Pval: 0.00013264  |
| Element: ATCTTAAGGGT      | Start: 255 | Stop: 245 | Pval: 0.000387716 |
| Element: TGCCAAAAGGT      | Start: 108 | Stop: 98  | Pval: 0.000642792 |
| Element: ACCGTAAAGAA      | Start: 712 | Stop: 702 | Pval: 0.000821345 |
| Matched Sequence: YPL159C | 0.00649087 | x         |                   |
| Element: GCCATTAAGGT      | Start: 733 | Stop: 723 | Pval: 0.000147944 |
| Element: ACCTTAATGGC      | Start: 723 | Stop: 733 | Pval: 0.000387716 |
| Element: ATCCCAAAGGG      | Start: 820 | Stop: 830 | Pval: 0.000387716 |
| Element: TCCCAAAGGGT      | Start: 821 | Stop: 831 | Pval: 0.000821345 |
| Element: ATTATAAAGGT      | Start: 930 | Stop: 940 | Pval: 0.000821345 |
| Matched Sequence: YDL124W | 0.00787981 | x         |                   |
| Element: ACCCTAAAGAA      | Start: 961 | Stop: 971 | Pval: 4.59137e-05 |
| Element: GCCTCAAAGGT      | Start: 627 | Stop: 617 | Pval: 0.000107132 |
| Element: ATCTTAAAGCT      | Start: 538 | Stop: 548 | Pval: 0.000387716 |
| Matched Sequence: YMR175W | 0.00787981 | SIP18     |                   |
| Element: ACCCTCAACCT      | Start: 89  | Stop: 99  | Pval: 0.000122436 |
| Element: ATCTTAAAGGG      | Start: 778 | Stop: 788 | Pval: 0.000387716 |
| Element: GCCCAAAGTT       | Start: 913 | Stop: 923 | Pval: 0.000387716 |
| Matched Sequence: YBR117C | 0.00787981 | TKL2      |                   |
| Element: ACCCATAAGGT      | Start: 167 | Stop: 157 | Pval: 1.0203e-05  |
| Element: ACCCAAATGT       | Start: 487 | Stop: 477 | Pval: 1.53046e-05 |
| Element: ACCTTATGGGT      | Start: 157 | Stop: 167 | Pval: 0.000387716 |
| Matched Sequence: YPL223C | 0.00977652 | GRE1      |                   |
| Element: ACCGTTAAGTT      | Start: 144 | Stop: 154 | Pval: 0.000158147 |
| Element: AACTTAACGGT      | Start: 154 | Stop: 144 | Pval: 0.000387716 |
| Element: ATCTTAAAGGA      | Start: 247 | Stop: 257 | Pval: 0.000387716 |
| Element: GCCCAAACGT       | Start: 683 | Stop: 673 | Pval: 0.000642792 |
