# Supplementary material
Source: PubMed Central journal article supplement (PMC373293)
Supplement: nar_32_1_179__18.pdf [file nar_32_1_179__18.pdf]

ROVER Output:

Sequence Pvalue Cutoff: 0.01

Site Pvalue Cutoff: 0.001

| Matrix | Pvalue      |                   |
|--------|-------------|-------------------|
| M00306 | 9.0576e-09  | LEU3              |
| M00754 | 2.10596e-06 | ZAP1              |
| M00730 | 1.35646e-05 | HAC1              |
| M00198 | 2.62159e-05 | GAL4              |
| M00049 | 0.000137335 | GAL4              |
| M00308 | 0.000271853 | STRE              |
| M00752 | 0.00105106  | PDR3              |
| M00213 | 0.00239583  | RAP1              |
| M00014 | 0.00283055  | repressor of CAR1 |
| M00207 | 0.0152082   | LAC9              |
| M00305 | 0.0225827   | HAP1              |
| M00168 | 0.0358573   | HSF               |
| M00064 | 0.0408669   | PHO4              |
| M00713 | 0.0415471   | TBP               |
| M00125 | 0.0636197   | MCM1              |
| M00307 | 0.0833203   | REB1              |
| M00167 | 0.117662    | HSF               |
| M00197 | 0.149592    | ABF1              |
| M00303 | 0.150195    | CBF1              |
| M00038 | 0.163406    | GCN4              |
| M00048 | 0.178396    | ADR1              |
| M00029 | 0.244164    | HSF               |
| M00169 | 0.316957    | HSF               |
| M00753 | 0.340757    | RCS1              |
| M00732 | 0.369861    | CAT8              |
| M00683 | 0.419137    | XBP1              |
| M00030 | 0.509513    | MATalpha1         |
| M00703 | 0.538707    | TAF               |
| M00015 | 0.567047    | ABF1              |
| M00337 | 0.677215    | GCR1              |
| M00276 | 0.751051    | Mat1-Mc           |
| M00664 | 0.768038    | STE12             |
| M00274 | 0.774299    | STE11             |
| M00170 | 0.851486    | HSF               |
| M00759 | 0.869188    | MCM1+SFF          |
| M00031 | 0.870468    | MATalpha2         |
| M00728 | 0.89578     | ROX1              |
| M00061 | 0.896981    | MIG1              |
| M00275 | 0.932083    | MAT1-Mc           |
| M00288 | 0.95695     | HAP2/3/5          |
| M00199 | 0.987057    | AP1               |
| M00046 | 0.989376    | GCR1              |
| M00204 | 0.991328    | GCN4              |
