# Supplementary material
Source: PubMed Central journal article supplement (PMC373293)

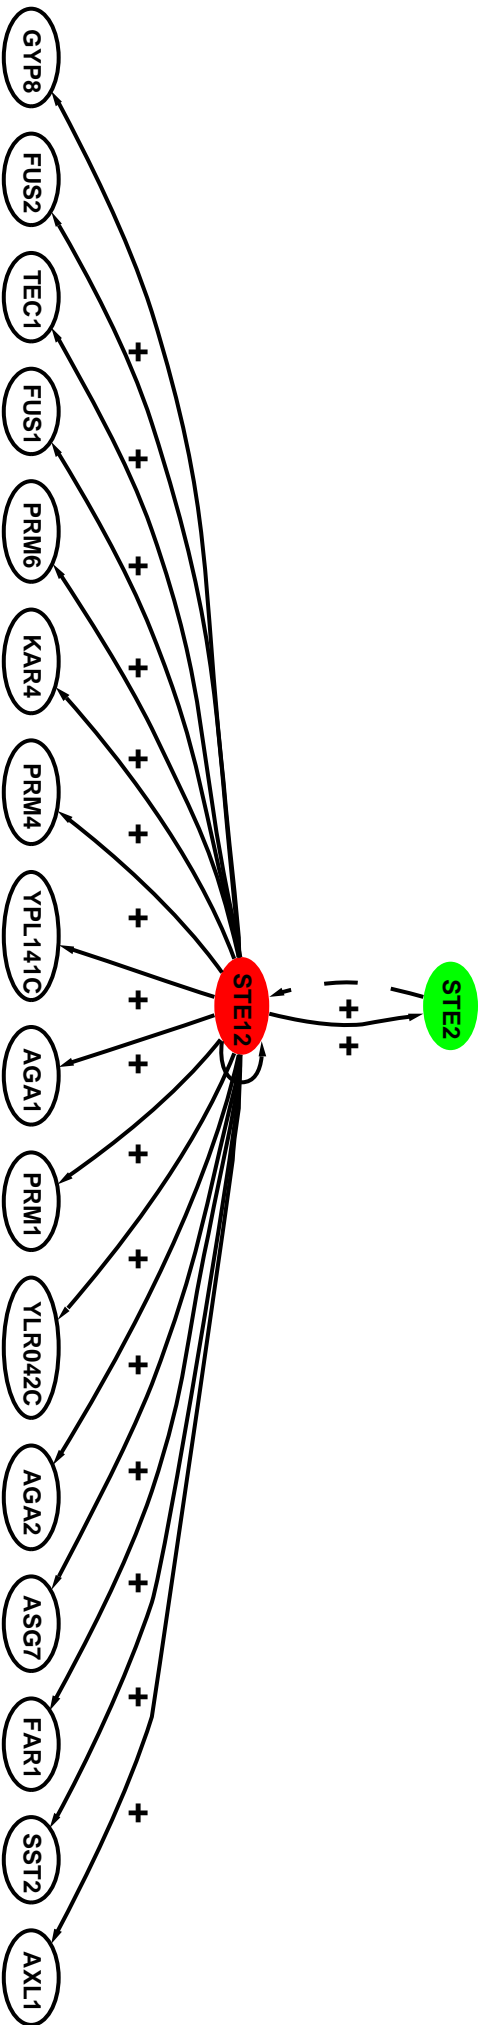

Supplement: nar_32_1_179__1.pdf [file nar_32_1_179__1.pdf]

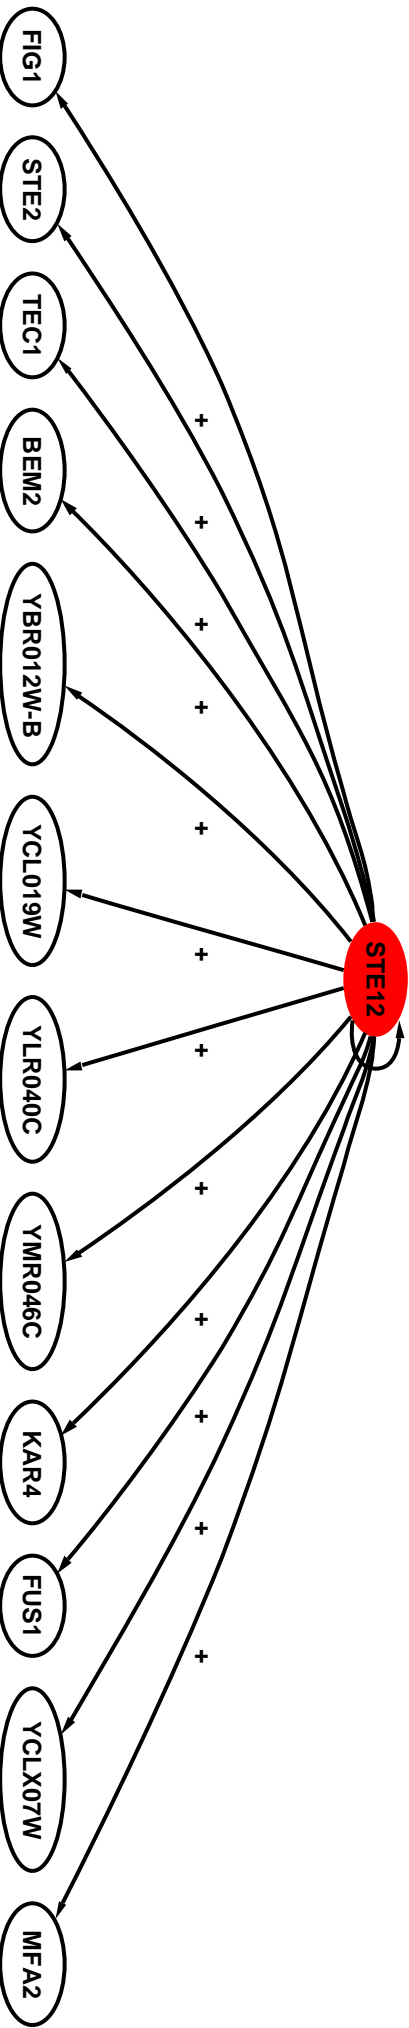

Supplement: nar_32_1_179__10.pdf [file nar_32_1_179__10.pdf]

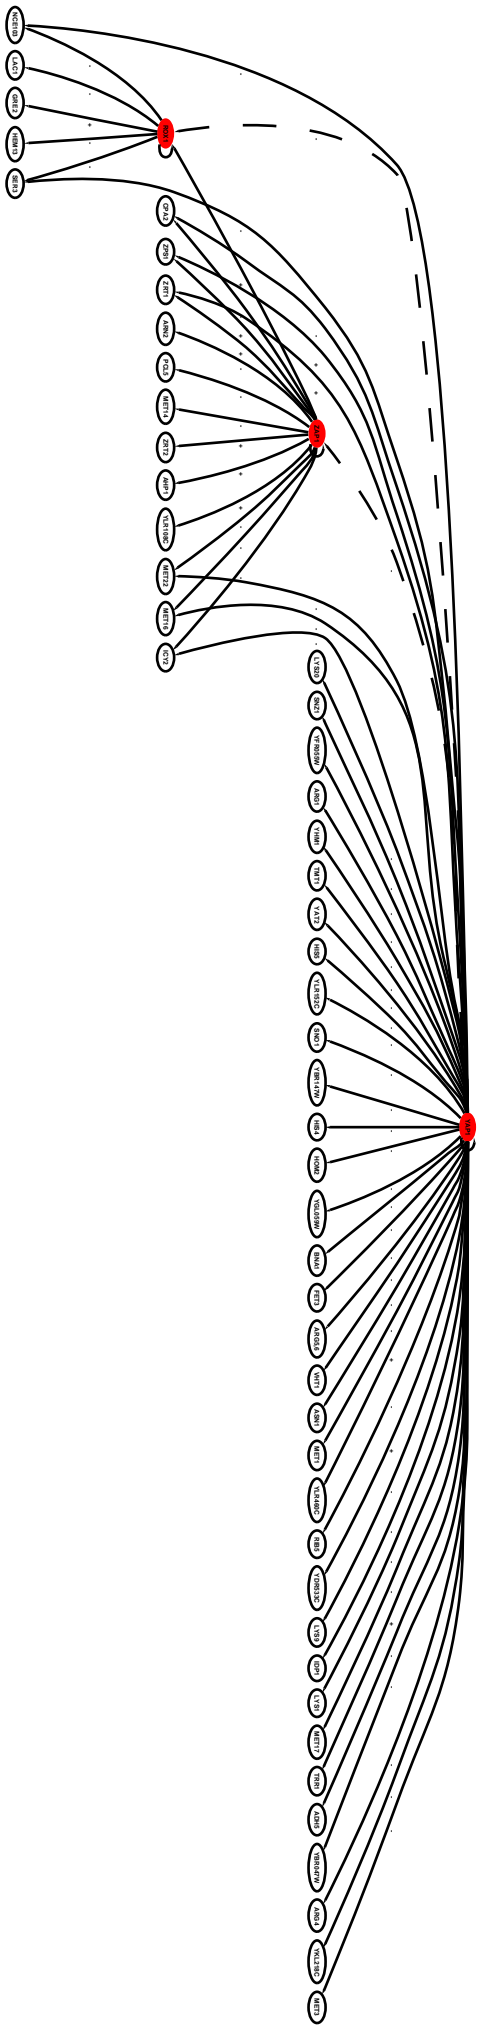

Supplement: nar_32_1_179__13.pdf [file nar_32_1_179__13.pdf]

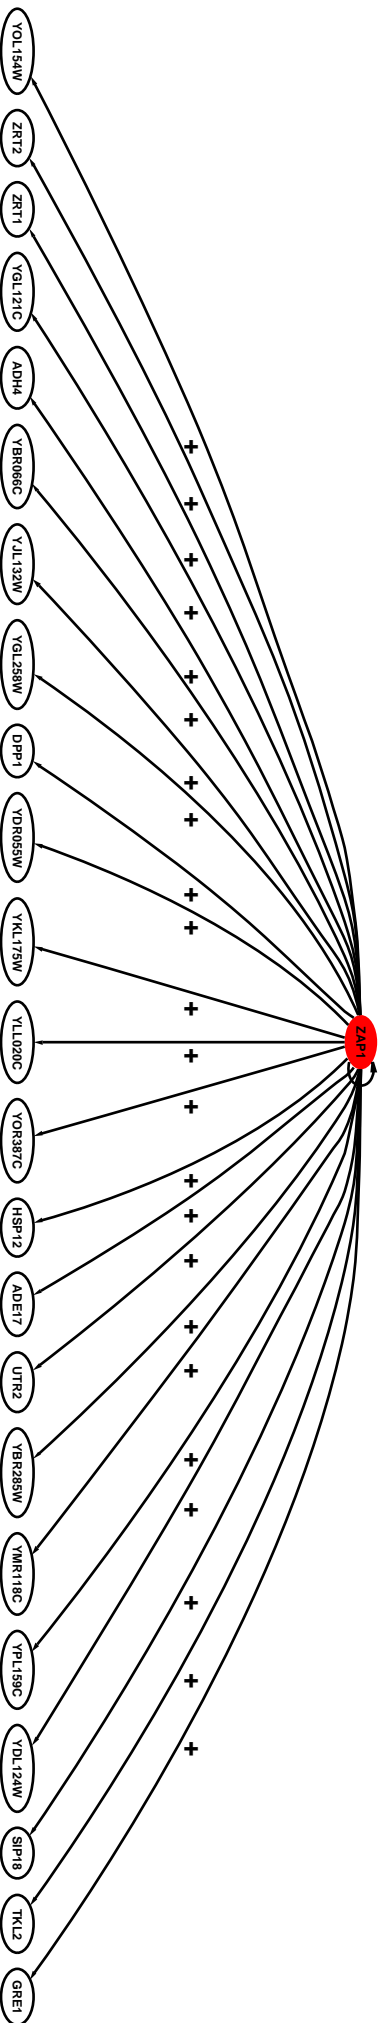

Supplement: nar_32_1_179__16.pdf [file nar_32_1_179__16.pdf]

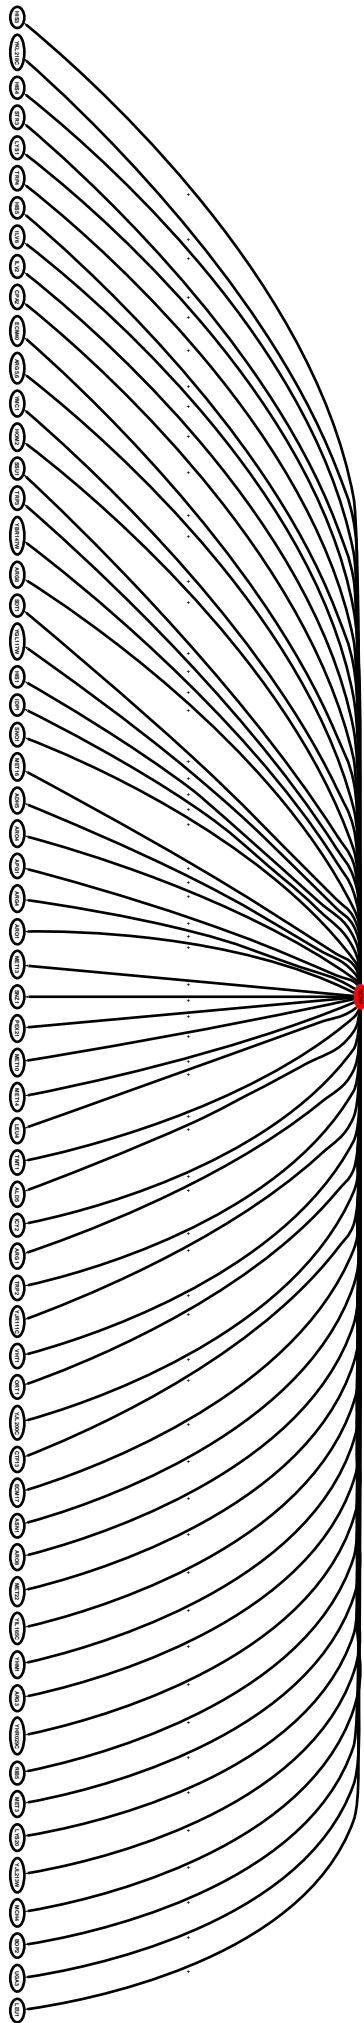

Supplement: nar_32_1_179__4.pdf [file nar_32_1_179__4.pdf]

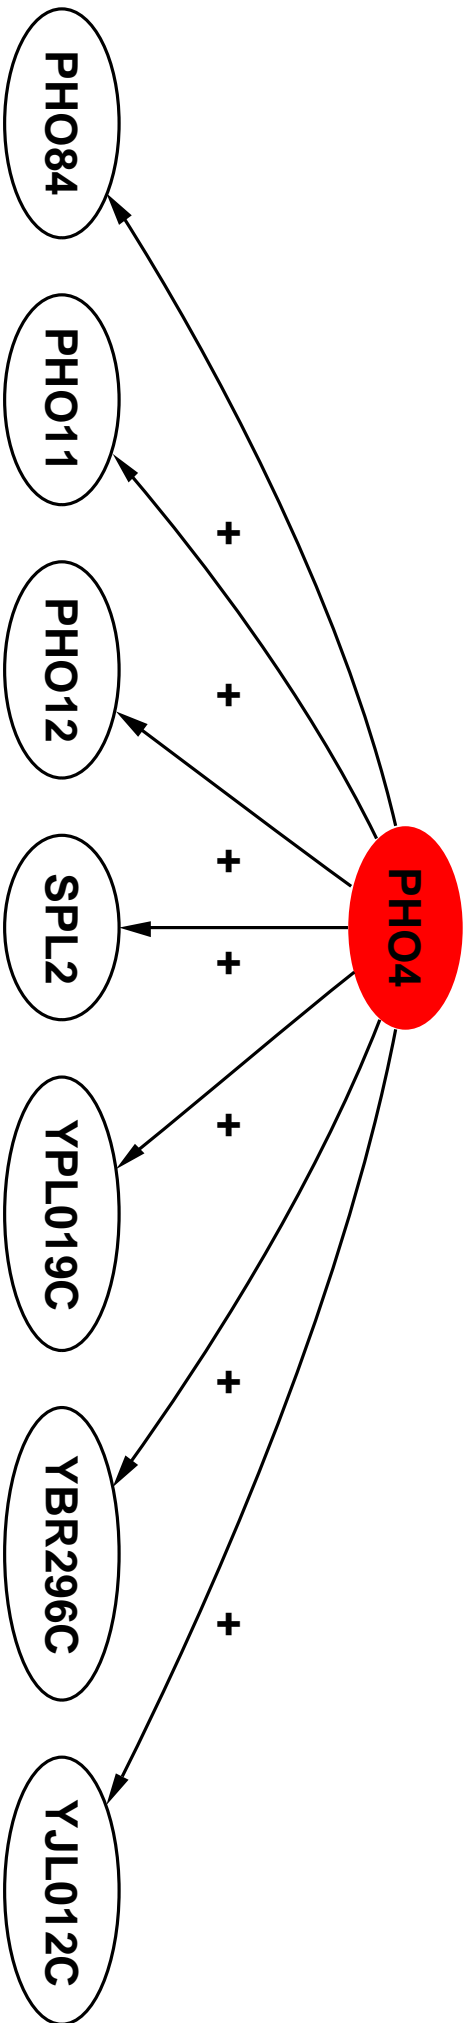

Supplement: nar_32_1_179__7.pdf [file nar_32_1_179__7.pdf]
